# Supplementary material for: A new sensor for detection of CH3CN and ClCH2CN vapors based on vapoluminescent platinum(ii) complex
Source: Royal Society of Chemistry journal article supplement (doi:10.1039/c3dt51397a), 2013-01-01
Supplement: c3dt51397a.pdf [file c3dt51397a.pdf]

# Supporting Information

## A New Sensor for Detection of CH<sub>3</sub>CN and ClCH<sub>2</sub>CN Vapors Based on Vapoluminescent Platinum (II) Complex

Jun Ni,<sup>\*a,b</sup> You-Gui Wang,<sup>a</sup> Jin-Yun Wang,<sup>b</sup> Yan-Qiu Zhao,<sup>a</sup> Yu-Zhen Pan,<sup>a</sup> Hui-Hui Wang,<sup>a</sup> Xu Zhang,<sup>b</sup> Jian-Jun Zhang<sup>a</sup> and Zhong-Ning Chen<sup>\*b</sup>

<sup>a</sup>*College of Chemistry, Dalian University of Technology, 2 Lingshui Road, Dalian 116023, China,*

<sup>b</sup>*State Key Laboratory of Structural Chemistry, Fujian Institute of Research on the Structure of Matter, Chinese Academy of Sciences, Fuzhou, Fujian 350002, China.*

## Contents

|                                                                                                                                                                                                        |    |
|--------------------------------------------------------------------------------------------------------------------------------------------------------------------------------------------------------|----|
| <b>Table S1.</b> Crystal data and structure refinement of <b>1</b> ·VOC (VOC = CH <sub>2</sub> Cl <sub>2</sub> , CHCl <sub>3</sub> , and CH <sub>3</sub> CN).....                                      | 5  |
| <b>Table S2.</b> Selected bond lengths (Å) and bond angles (°) for <b>1</b> ·VOC (VOC = CH <sub>2</sub> Cl <sub>2</sub> , CHCl <sub>3</sub> , and CH <sub>3</sub> CN).....                             | 6  |
| <b>Table S3.</b> Hydrogen-bonding geometry (Å, °) for <b>1</b> ·VOC (VOC = CH <sub>2</sub> Cl <sub>2</sub> , CHCl <sub>3</sub> , and CH <sub>3</sub> CN).....                                          | 7  |
| <b>Table S4.</b> The optimized coordinates of <b>1</b> monomer by DFT method at the PBE1PBE level.....                                                                                                 | 8  |
| <b>Table S5.</b> Partial molecular orbital compositions (%) in the ground state for <b>1</b> in dichloromethane solution by TD-DFT method at the PBE1PBE level.....                                    | 12 |
| <b>Table S6.</b> Absorption and emission transition properties of <b>1</b> in dichloromethane solution by TD-DFT method at the PBE1PBE level with the polarized continuum model (PCM).....             | 13 |
| <b>Table S7.</b> Partial molecular orbital compositions (%) in the ground state for solid-state <b>1</b> ·1/2(CH <sub>2</sub> Cl <sub>2</sub> ) by TD-DFT method at the PBE1PBE level.....             | 14 |
| <b>Table S8.</b> Absorption and emission transitions properties of <b>1</b> ·1/2(CH <sub>2</sub> Cl <sub>2</sub> ) by TD-DFT method at the PBE1PBE level with the polarized continuum model (PCM)..... | 15 |
| <b>Table S9.</b> Partial molecular orbital compositions (%) in the ground state for solid-state <b>1</b> ·CHCl <sub>3</sub> by TD-DFT method at the PBE1PBE level.....                                 | 16 |
| <b>Table S10.</b> Absorption and emission transition properties of <b>1</b> ·CHCl <sub>3</sub> by TD-DFT method at the PBE1PBE level with the polarized continuum model (PCM).....                     | 17 |
| <b>Table S11.</b> Partial molecular orbital compositions (%) in the ground state for solid-state <b>1</b> ·CH <sub>3</sub> CN by TD-DFT method at the PBE1PBE level.....                               | 18 |
| <b>Table S12.</b> Absorption and emission transition properties of <b>1</b> ·CH <sub>3</sub> CN by TD-DFT method at the PBE1PBE level with the polarized continuum model (PCM).....                    | 19 |

- Figure S1.** Crystal packing diagram of adjacent planar platinum moieties in  $\mathbf{1}\cdot\text{CHCl}_3$ , showing an antiparallel pattern in the case of  $\text{Pt}\cdots\text{Pt} > 3.5 \text{ \AA}$ .....20
- Figure S2.** One Pt moiety plane in  $\mathbf{1}\cdot\frac{1}{2}\text{CH}_2\text{Cl}_2$ , observed from  $c$  axis direction. H atoms are omitted for clarity.....21
- Figure S3.** One Pt moiety plane in  $\mathbf{1}\cdot\text{CHCl}_3$ , observed from  $c$  axis direction. H atoms are omitted for clarity.....21
- Figure S4.** The hydrogen bonds between solvate molecules and platinum moieties in  $\mathbf{1}\cdot\frac{1}{2}\text{CH}_2\text{Cl}_2$  (a) and  $\mathbf{1}\cdot\text{CHCl}_3$  (b). H atoms not participating in the hydrogen bonds have been omitted for clarity.....22
- Figure S5.** The hydrogen bonds between solvate molecules and platinum moieties in  $\mathbf{1}\cdot\text{CH}_3\text{CN}$ . H atoms not participating in the hydrogen bonds have been omitted for clarity.....23
- Figure S6.** The layer stacking structure of  $\mathbf{1}\cdot\frac{1}{2}\text{CH}_2\text{Cl}_2$ . H atoms in Pt moieties are omitted for clarity.  
.....24
- Figure S7.** The layer stacking structure of  $\mathbf{1}\cdot\text{CHCl}_3$ . H atoms in Pt moieties are omitted for clarity.....24
- Figure S8.** 1-D column structure in  $\mathbf{1}\cdot\text{CH}_3\text{CN}$ . Acetonitrile solvate molecules are marked in pink color. H atoms not participating in the hydrogen bonds have been omitted for clarity.....25
- Figure S9.** Low-energy absorption (dash lines) and emission spectra (solid lines) of  $\mathbf{1}$  in various solvents at ambient temperature. ....26
- Figure S10.** Liquid state emission spectra of  $\mathbf{1}$  in various solvents at ambient temperature.....27
- Figure S11.** Liquid state emission spectra of  $\mathbf{1}$  in  $\text{CH}_2\text{Cl}_2$  solution with different concentration at ambient temperature.....28
- Figure S12.** Solid state emission spectra of  $\mathbf{1}\cdot\frac{1}{2}\text{CH}_2\text{Cl}_2$  during desorption process by heating at  $120^\circ\text{C}$

|                                                                                                                                                                                               |    |
|-----------------------------------------------------------------------------------------------------------------------------------------------------------------------------------------------|----|
| under N <sub>2</sub> atmosphere.....                                                                                                                                                          | 29 |
| <b>Figure S13.</b> Emission spectra of solid sample <b>1</b> upon exposure to various VOC vapors at ambient temperature.....                                                                  | 30 |
| <b>Figure S14.</b> Dynamic emission spectral changes of <b>1</b> ·CH <sub>3</sub> CN by heating at 120°C for 10 hours under N <sub>2</sub> atmosphere.....                                    | 31 |
| <b>Figure S15.</b> Photographic images of <b>1</b> deposited on quartz slices and exposed to selected organic vapors under ambient light and UV light irradiation (365 nm).....               | 32 |
| <b>Figure S16.</b> Optimized structure of <b>1</b> in the ground state by DFT method at the PBE1PBE level.....                                                                                | 32 |
| <b>Figure S17.</b> Calculated (blue vertical bars) and measured (black line) UV-vis absorption spectra of <b>1</b> in dichloromethane solution at ambient temperature.....                    | 33 |
| <b>Figure S18.</b> Calculated (blue vertical bars) and measured (black line) UV-vis absorption spectra of solid-state <b>1</b> ·1½CH <sub>2</sub> Cl <sub>2</sub> at ambient temperature..... | 34 |
| <b>Figure S19.</b> Calculated (blue vertical bars) and measured (black line) UV-vis absorption spectra of solid-state <b>1</b> ·CHCl <sub>3</sub> at ambient temperature.....                 | 35 |
| <b>Figure S20.</b> Calculated (blue vertical bars) and measured (black line) UV-vis absorption spectra of solid-state <b>1</b> ·CH <sub>3</sub> CN at ambient temperature.....                | 36 |
| <b>Figure S21.</b> Plots of the frontier molecular orbitals involved in the absorption of <b>1</b> in dichloromethane solution (isovalue = 0.02).....                                         | 37 |
| <b>Figure S22.</b> Plots of the frontier molecular orbitals involved in the absorption of <b>1</b> ·1½(CH <sub>2</sub> Cl <sub>2</sub> ) in solid state (isovalue = 0.02).....                | 38 |
| <b>Figure S23.</b> Plots of the frontier molecular orbitals involved in the absorption of <b>1</b> ·CHCl <sub>3</sub> in solid state                                                          |    |

(isovalue = 0.02).....40

**Figure S24.** Plots of the frontier molecular orbitals involved in the absorption of **1**·CH<sub>3</sub>CN in solid state

(isovalue = 0.02).....42

**Table S1.** Crystal data and structure refinement of **1**·VOC (VOC = CH<sub>2</sub>Cl<sub>2</sub>, CHCl<sub>3</sub>, and CH<sub>3</sub>CN).

|                                                        | <b>1</b> ·1½(CH <sub>2</sub> Cl <sub>2</sub> )                                     | <b>1</b> ·CHCl <sub>3</sub>                                                      | <b>1</b> ·CH <sub>3</sub> CN                                     |
|--------------------------------------------------------|------------------------------------------------------------------------------------|----------------------------------------------------------------------------------|------------------------------------------------------------------|
| empirical formula                                      | C <sub>41.5</sub> H <sub>45</sub> Cl <sub>3</sub> N <sub>2</sub> PtSi <sub>2</sub> | C <sub>41</sub> H <sub>42</sub> Cl <sub>3</sub> N <sub>2</sub> PtSi <sub>2</sub> | C <sub>42</sub> H <sub>45</sub> N <sub>3</sub> PtSi <sub>2</sub> |
| fw                                                     | 929.41                                                                             | 920.39                                                                           | 843.07                                                           |
| space group                                            | <i>P</i> -1                                                                        | <i>P</i> -1                                                                      | <i>P</i> 2 <sub>1</sub> / <i>c</i>                               |
| <i>a</i> , Å                                           | 12.1068(4)                                                                         | 12.3245(5)                                                                       | 13.2821(3)                                                       |
| <i>b</i> , Å                                           | 18.3651(7)                                                                         | 18.1803(7)                                                                       | 30.6005(7)                                                       |
| <i>c</i> , Å                                           | 21.0217(7)                                                                         | 19.7378(8)                                                                       | 20.2538(4)                                                       |
| $\alpha$ , °                                           | 74.111(2)                                                                          | 88.681(2)                                                                        | 90                                                               |
| $\beta$ , °                                            | 77.900(2)                                                                          | 74.458(2)                                                                        | 91.823(1)                                                        |
| $\gamma$ , °                                           | 81.188(2)                                                                          | 79.431(2)                                                                        | 90                                                               |
| <i>V</i> , Å <sup>3</sup>                              | 4372.7(3)                                                                          | 4186.9(3)                                                                        | 8227.8(3)                                                        |
| <i>Z</i>                                               | 2                                                                                  | 4                                                                                | 8                                                                |
| <i>D</i> <sub>c</sub> /gcm <sup>-3</sup>               | 1.412                                                                              | 1.460                                                                            | 1.361                                                            |
| $\mu$ , mm <sup>-1</sup>                               | 3.476                                                                              | 3.629                                                                            | 3.499                                                            |
| <i>F</i> (000)                                         | 1860                                                                               | 1836                                                                             | 3392                                                             |
| Reflections collected / unique                         | 40932 / 15364                                                                      | 49631 / 14723                                                                    | 54141 / 14460                                                    |
| <i>R</i> <sub>int</sub>                                | 0.038                                                                              | 0.044                                                                            | 0.045                                                            |
| temp, (K)                                              | 273                                                                                | 210                                                                              | 296                                                              |
| R1( <i>F</i> <sub>o</sub> ) <sup>a</sup>               | 0.0344                                                                             | 0.0403                                                                           | 0.0365                                                           |
| wR2( <i>F</i> <sub>o</sub> <sup>2</sup> ) <sup>b</sup> | 0.0908                                                                             | 0.0864                                                                           | 0.0826                                                           |
| GOF                                                    | 1.010                                                                              | 1.090                                                                            | 1.021                                                            |

<sup>a</sup>R1 =  $\Sigma|F_o - F_c| / \Sigma F_o$ ; <sup>b</sup>wR2 =  $\Sigma[w(F_o^2 - F_c^2)^2] / \Sigma[w(F_o^2)]^{1/2}$

**Table S2.** Selected bond lengths (Å) and bond angles (°) for **1**·VOC (VOC = CH<sub>2</sub>Cl<sub>2</sub>, CHCl<sub>3</sub>, and CH<sub>3</sub>CN).

|                           | <b>1</b> ·1½(CH <sub>2</sub> Cl <sub>2</sub> ) | <b>1</b> ·CHCl <sub>3</sub> | <b>1</b> ·CH <sub>3</sub> CN |
|---------------------------|------------------------------------------------|-----------------------------|------------------------------|
| Shortest Pt...Pt distance | 4.028                                          | 4.241                       | 3.328                        |
| Pt1-N                     | 2.068(4), 2.069(4)                             | 2.069(3), 2.066(3)          | 2.053(4), 2.079(4)           |
| Pt2-N                     | 2.068(4), 2.064(4)                             | 2.075(3), 2.080(3)          | 2.061(4), 2.071(4)           |
| Pt1-C                     | 1.950(5), 1.953(4)                             | 1.959(4), 1.956(4)          | 1.938(6), 1.952(6)           |
| Pt2-C                     | 1.951(6), 1.953(5)                             | 1.939(4), 1.964(4)          | 1.942(6), 1.951(6)           |
| N1-Pt1-N2                 | 79.23(14)                                      | 79.04(11)                   | 79.04(16)                    |
| N1-Pt1-C21                | 93.48(16)                                      | 93.49(14)                   | 93.7(2)                      |
| N2-Pt1-C31                | 96.13(18)                                      | 95.13(13)                   | 97.19(19)                    |
| C21-Pt1-C31               | 91.2(2)                                        | 92.34(15)                   | 90.1(2)                      |
| N3-Pt2-N4                 | 79.15(15)                                      | 79.27(12)                   | 78.71(17)                    |
| N3-Pt2-C61                | 94.8(2)                                        | 93.30(14)                   | 96.7(2)                      |
| N4-Pt2-C71                | 94.05(17)                                      | 96.66(14)                   | 93.9(2)                      |
| C61-Pt2-C71               | 92.0(2)                                        | 90.76(16)                   | 90.7(3)                      |

**Table S3.** Hydrogen-bonding geometry (Å, °) for **1**·VOC (VOC = CH<sub>2</sub>Cl<sub>2</sub>, CHCl<sub>3</sub>, and CH<sub>3</sub>CN).

| <b>1</b> ·1/2(CH <sub>2</sub> Cl <sub>2</sub> ) |             |               |                       |                         |               |
|-------------------------------------------------|-------------|---------------|-----------------------|-------------------------|---------------|
| <i>D</i> -H... <i>A</i>                         | <i>D</i> -H | H... <i>A</i> | <i>D</i> ... <i>A</i> | <i>D</i> -H... <i>A</i> | Symmetry code |
| C01-H01A...π(C61≡C62)                           | 0.97        | 2.76          | 3.405                 | 125                     | x,y,z         |
| C01-H01B...π(C71≡C72)                           | 0.97        | 2.63          | 3.547                 | 158                     | x,y,z         |
| C03-H03B...Cg1                                  | 0.97        | 2.68          | 3.649                 | 174                     | 1-x,1-y,1-z   |
| C48-H48A...π(C31≡C32)                           | 0.93        | 2.85          | 3.516                 | 130                     | x,1+y,z       |
| C49-H49A...π(C21≡C22)                           | 0.93        | 2.84          | 3.745                 | 165                     | x,1+y,z       |

Cg1 is the benzene ring containing C63 atom.

  

| <b>1</b> ·CHCl <sub>3</sub> |             |               |                       |                         |               |
|-----------------------------|-------------|---------------|-----------------------|-------------------------|---------------|
| <i>D</i> -H... <i>A</i>     | <i>D</i> -H | H... <i>A</i> | <i>D</i> ... <i>A</i> | <i>D</i> -H... <i>A</i> | Symmetry code |
| C01-H01...π(C21≡C22)        | 0.98        | 2.75          | 3.550                 | 140                     | x,y,z         |
| C01-H01...π(C31≡C32)        | 0.98        | 2.89          | 3.549                 | 125                     | x,y,z         |
| C02-H02...π(C31≡C32)        | 0.98        | 2.60          | 3.578                 | 174                     | x,y,z         |
| C38-H38...Cl4               | 0.93        | 2.91          | 3.827                 | 171                     | x,y,z         |
| C12-H12...π(C61≡C62)        | 0.93        | 2.90          | 3.823                 | 171                     | x,y,z         |
| C13-H13...π(C71≡C72)        | 0.93        | 2.86          | 3.504                 | 127                     | x,y,z         |

  

| <b>1</b> ·CH <sub>3</sub> CN |             |               |                       |                         |                |
|------------------------------|-------------|---------------|-----------------------|-------------------------|----------------|
| <i>D</i> -H... <i>A</i>      | <i>D</i> -H | H... <i>A</i> | <i>D</i> ... <i>A</i> | <i>D</i> -H... <i>A</i> | Symmetry code  |
| C74-H74A...π(C04≡N02)        | 0.93        | 2.93          | 3.843                 | 166                     | x,y,z          |
| C9-H9A...N01                 | 0.93        | 2.70          | 3.325                 | 126                     | x,y,-1+z       |
| C01-H01C...π(C31≡C32)        | 0.96        | 2.78          | 3.501                 | 132                     | 1-x,-y,1-z     |
| C19-H19C...π(C02≡N01)        | 0.96        | 2.73          | 3.600                 | 151                     | x,0.5-y,-0.5+z |
| C52-H52A...N02               | 0.93        | 2.75          | 3.419                 | 129                     | -x,-y,-z       |



**Table S4.** The optimized coordinates of **1** monomer by DFT method at the PBE1PBE level.

| Atom | Coordinates (Angstroms) |             |             |
|------|-------------------------|-------------|-------------|
|      | X                       | Y           | Z           |
| Pt   | -0.01993500             | -0.38461200 | 0.01503600  |
| Si   | 7.86141800              | -2.14180600 | -0.18856000 |
| Si   | -7.96812200             | -2.15760600 | 0.11193000  |
| N    | 1.27841000              | -2.01896900 | -0.01913300 |
| N    | -1.34904800             | -1.99600300 | 0.02585700  |
| C    | 2.60587100              | -1.91524900 | -0.05024200 |
| H    | 2.99360000              | -0.90046500 | -0.05828300 |
| C    | 3.44765500              | -3.03416100 | -0.07120200 |
| C    | 2.84645900              | -4.30174200 | -0.06056800 |
| H    | 3.46437100              | -5.19312600 | -0.07648600 |
| C    | 1.46575600              | -4.39810100 | -0.03137300 |
| H    | 0.99462300              | -5.37413400 | -0.02500500 |
| C    | 0.68755300              | -3.23982800 | -0.01108100 |
| C    | -0.77849300             | -3.22669700 | 0.01567900  |
| C    | -1.57570400             | -4.37194400 | 0.02734200  |
| H    | -1.12077900             | -5.35558300 | 0.02028700  |
| C    | -2.95428100             | -4.25214600 | 0.04760900  |
| H    | -3.58749300             | -5.13282000 | 0.05654400  |
| C    | -3.53508300             | -2.97482100 | 0.05618700  |
| C    | -2.67507000             | -1.86970100 | 0.04517800  |
| H    | -3.04446500             | -0.84807500 | 0.05239100  |
| C    | 4.85259900              | -2.83944000 | -0.10295600 |
| C    | 6.04975600              | -2.61070900 | -0.13259400 |
| C    | -4.93902600             | -2.76961400 | 0.07495500  |
| C    | -6.13949500             | -2.55717700 | 0.09014600  |

|   |             |             |             |
|---|-------------|-------------|-------------|
| C | 8.00359200  | -0.55783700 | -1.22340500 |
| H | 7.67552600  | -0.73302400 | -2.25195000 |
| H | 7.38584800  | 0.24353500  | -0.80683600 |
| H | 9.04163800  | -0.21097000 | -1.25253500 |
| C | 8.44156300  | -1.84811200 | 1.59546100  |
| H | 9.49725100  | -1.55839400 | 1.60870900  |
| H | 7.86386000  | -1.04892300 | 2.06840500  |
| H | 8.32975700  | -2.75233000 | 2.20044500  |
| C | 8.82624100  | -3.57051500 | -0.98366200 |
| H | 8.47172400  | -3.76565400 | -1.99972900 |
| H | 9.89209400  | -3.32661500 | -1.03772600 |
| H | 8.71846700  | -4.49049200 | -0.40200800 |
| C | -8.13678100 | -0.26718200 | 0.12998400  |
| H | -7.65319800 | 0.15938600  | 1.01379900  |
| H | -7.67323300 | 0.17434800  | 0.75722100  |
| H | -9.19183900 | 0.02457300  | 0.14442200  |
| C | -8.72347100 | -2.92488600 | 1.67560600  |
| H | -8.59720300 | -4.01127400 | 1.68172300  |
| H | -8.25262100 | -2.52194200 | 2.57667300  |
| H | -9.79519800 | -2.70723500 | 1.72589100  |
| C | -8.75386200 | -2.89797300 | -1.44980000 |
| H | -8.62880000 | -3.98419300 | -1.47643100 |
| H | -9.82614100 | -2.67879100 | -1.47624600 |
| H | -8.29965700 | -2.48043300 | -2.35276800 |
| C | 1.37829400  | 0.95443200  | 0.00650100  |
| C | 2.35373200  | 1.69724000  | 0.00050100  |
| C | 3.48411500  | 2.56297200  | -0.01790500 |
| C | 4.71421700  | 2.16253400  | 0.53361100  |
| H | 4.79082000  | 1.17959200  | 0.99026400  |
| C | 5.81685000  | 3.00572900  | 0.50286700  |

|   |             |            |             |
|---|-------------|------------|-------------|
| H | 6.75697000  | 2.67365900 | 0.94003600  |
| C | 5.74380500  | 4.27582300 | -0.07750700 |
| C | 4.52056000  | 4.67345400 | -0.62590600 |
| H | 4.43874600  | 5.65631600 | -1.08585800 |
| C | 3.41032400  | 3.84074700 | -0.59887300 |
| H | 2.46907000  | 4.16402900 | -1.03246100 |
| C | 6.92889800  | 5.20555100 | -0.06594600 |
| H | 6.91304500  | 5.82991200 | -0.96749700 |
| H | 7.85488500  | 4.61941200 | -0.11026700 |
| C | 6.95725800  | 6.10516800 | 1.17188700  |
| H | 7.82502700  | 6.77292600 | 1.15728700  |
| H | 6.05428300  | 6.72135600 | 1.22636300  |
| H | 7.00244700  | 5.50722500 | 2.08763500  |
| C | -1.38024600 | 0.99220100 | 0.04581500  |
| C | -2.31627500 | 1.78396900 | 0.06627100  |
| C | -3.37159600 | 2.73919000 | 0.08975800  |
| C | -4.72034900 | 2.34282700 | 0.09540800  |
| H | -4.95920800 | 1.28279000 | 0.08375300  |
| C | -5.73928700 | 3.28517200 | 0.12143900  |
| H | -6.77542400 | 2.95134600 | 0.12969200  |
| C | -5.46095600 | 4.65528500 | 0.14265600  |
| C | -4.11928000 | 5.04946600 | 0.13920500  |
| H | -3.87648300 | 6.11001500 | 0.16174900  |
| C | -3.09197700 | 4.11696000 | 0.11351300  |
| H | -2.05522800 | 4.43878700 | 0.11656200  |
| C | -6.56999300 | 5.67444500 | 0.12235100  |
| H | -6.25051900 | 6.57316700 | 0.66358800  |
| H | -7.44028300 | 5.28031200 | 0.66109800  |
| C | -6.98624000 | 6.06087600 | -1.29880600 |
| H | -7.79083000 | 6.80361900 | -1.28867200 |

|   |             |            |             |
|---|-------------|------------|-------------|
| H | -6.14041600 | 6.48209700 | -1.85122800 |
| H | -7.33759800 | 5.18519800 | -1.85379400 |

**Table S5.** Partial molecular orbital compositions (%) in the ground state for **1** in dichloromethane solution by TD-DFT method at the PBE1PBE level.

| Orbital | Energy (eV) | MO Contribution (%) |                                              |         |
|---------|-------------|---------------------|----------------------------------------------|---------|
|         |             | Pt (s/p/d)          | Me <sub>3</sub> SiC≡CbpyC≡CSiMe <sub>3</sub> | C≡CPhEt |
| LUMO+4  | -0.57       | 13.63 (0/75/24)     | 11.52                                        | 74.85   |
| LUMO+2  | -1.22       | 0.89 (0/1/97)       | 97.33                                        | 1.78    |
| LUMO+1  | -1.57       | 4.29 (0/74/24)      | 92.02                                        | 3.69    |
| LUMO    | -2.78       | 2.96 (0/37/62)      | 94.91                                        | 2.13    |
| HOMO    | -5.59       | 22.84 (0/0/100)     | 1.70                                         | 75.47   |
| HOMO-1  | -5.78       | 24.58 (0/6/93)      | 4.77                                         | 70.66   |
| HOMO-2  | -6.33       | 40.22 (1/1/98)      | 5.32                                         | 54.47   |
| HOMO-3  | -6.80       | 17.22 (16/0/82)     | 31.29                                        | 51.48   |
| HOMO-5  | -6.86       | 2.62 (2/2/95)       | 71.31                                        | 26.07   |

**Table S6.** Absorption and emission transition properties of **1** in dichloromethane solution by TD-DFT method at the PBE1PBE level with the polarized continuum model (PCM).

| States          | $E$ , nm<br>(eV) | O.S.   | Component     | Contri. | Assignment                                            | Measured<br>Wavelength<br>(nm) |
|-----------------|------------------|--------|---------------|---------|-------------------------------------------------------|--------------------------------|
| T <sub>1</sub>  | 615<br>(2.02)    | 0.0000 | HOMO→LUMO     | 85%     | <sup>3</sup> LLCT/ <sup>3</sup> MLCT                  | 640                            |
|                 |                  |        | HOMO-5→LUMO   | 9%      | <sup>3</sup> IL/ <sup>3</sup> LLCT                    |                                |
| S <sub>2</sub>  | 522<br>(2.38)    | 0.1283 | HOMO-1→LUMO   | 95%     | <sup>1</sup> LLCT/ <sup>1</sup> MLCT                  |                                |
| S <sub>3</sub>  | 452<br>(2.74)    | 0.0181 | HOMO-2→LUMO   | 97%     | <sup>1</sup> LLCT/ <sup>1</sup> MLCT                  | 457                            |
| S <sub>7</sub>  | 356<br>(3.48)    | 1.2234 | HOMO-5→LUMO   | 66%     | <sup>1</sup> IL/ <sup>1</sup> LLCT                    | 369                            |
|                 |                  |        | HOMO-3→LUMO   | 10%     | <sup>1</sup> LLCT/ <sup>1</sup> IL/ <sup>1</sup> MLCT |                                |
| S <sub>9</sub>  | 334<br>(3.72)    | 0.1511 | HOMO→LUMO+2   | 85%     | <sup>1</sup> LLCT/ <sup>1</sup> MLCT                  | 340                            |
|                 |                  |        | HOMO-1→LUMO+1 | 9%      | <sup>1</sup> LLCT/ <sup>1</sup> MLCT                  |                                |
| S <sub>12</sub> | 319<br>(3.89)    | 0.2824 | HOMO-1→LUMO+2 | 75%     | <sup>1</sup> LLCT/ <sup>1</sup> MLCT                  |                                |
|                 |                  |        | HOMO-2→LUMO+1 | 17%     | <sup>1</sup> LLCT/ <sup>1</sup> MLCT                  |                                |
| S <sub>19</sub> | 293<br>(4.23)    | 0.6218 | HOMO→LUMO+4   | 88%     | <sup>1</sup> IL/ <sup>1</sup> MC/ <sup>1</sup> MLCT   | 290                            |
| S <sub>25</sub> | 275<br>(4.50)    | 0.1626 | HOMO-1→LUMO+4 | 47%     | <sup>1</sup> IL/ <sup>1</sup> MC/ <sup>1</sup> MLCT   | 276                            |
|                 |                  |        | HOMO-5→LUMO+1 | 15%     | <sup>1</sup> IL/ <sup>1</sup> LLCT                    |                                |
|                 |                  |        | HOMO-2→LUMO+4 | 13%     | <sup>1</sup> IL/ <sup>1</sup> MLCT/ <sup>1</sup> MC   |                                |

IL denotes intraligand  $\pi \rightarrow \pi^*$  transition of  $\text{Me}_3\text{SiC}\equiv\text{CbpYc}\equiv\text{CSiMe}_3$ ; LLCT denotes  $\pi(\text{C}\equiv\text{CC}_6\text{H}_4\text{Et-4}) \rightarrow \pi^*(\text{Me}_3\text{SiC}\equiv\text{CbpYc}\equiv\text{CSiMe}_3)$  state; MLCT denotes  $5d(\text{Pt}) \rightarrow \pi^*(\text{Me}_3\text{SiC}\equiv\text{CbpYc}\equiv\text{CSiMe}_3)$  state; MC denotes metal-centered transition.

**Table S7.** Partial molecular orbital compositions (%) in the ground state for solid-state  $1 \cdot 1\frac{1}{2}(\text{CH}_2\text{Cl}_2)$  by TD-DFT method at the PBE1PBE level.

| Orbital | Energy (eV) | MO Contribution (%) |                                                                               |                              |
|---------|-------------|---------------------|-------------------------------------------------------------------------------|------------------------------|
|         |             | Pt (s/p/d)          | $\text{Me}_3\text{SiC}\equiv\text{C}(\text{bpy})\text{C}\equiv\text{CSiMe}_3$ | $\text{C}\equiv\text{CPhEt}$ |
| LUMO+5  | -0.84       | 4.91 (15/39/45)     | 91.24                                                                         | 3.85                         |
| LUMO+4  | -0.92       | 8.14 (40/48/12)     | 83.32                                                                         | 8.53                         |
| LUMO+2  | -1.24       | 13.18 (48/41/11)    | 81.37                                                                         | 5.46                         |
| LUMO+1  | -2.25       | 15.24 (42/37/21)    | 78.49                                                                         | 6.28                         |
| LUMO    | -2.36       | 3.75 (2/4/55)       | 93.38                                                                         | 2.88                         |
| HOMO    | -5.04       | 24.85 (0/0/99)      | 4.99                                                                          | 70.16                        |
| HOMO-2  | -5.30       | 27.02 (2/6/92)      | 7.18                                                                          | 65.79                        |
| HOMO-3  | -5.30       | 26.27 (2/6/91)      | 6.51                                                                          | 67.21                        |
| HOMO-4  | -5.68       | 40.24 (2/2/96)      | 6.29                                                                          | 53.48                        |
| HOMO-8  | -6.21       | 8.26 (5/6/87)       | 9.88                                                                          | 81.86                        |
| HOMO-10 | -6.49       | 35.26 (23/0/76)     | 51.25                                                                         | 13.50                        |
| HOMO-11 | -6.55       | 2.94 (20/5/75)      | 75.46                                                                         | 21.59                        |
| HOMO-14 | -6.77       | 4.23 (8/20/72)      | 16.62                                                                         | 79.15                        |
| HOMO-15 | -6.79       | 1.64 (15/2/83)      | 27.91                                                                         | 70.46                        |
| HOMO-25 | -7.80       | 2.54 (2/31/67)      | 92.81                                                                         | 4.65                         |
| HOMO-26 | -7.80       | 1.26 (13/63/22)     | 95.20                                                                         | 3.54                         |

**Table S8.** Absorption and emission transition properties of  $1 \cdot 1\frac{1}{2}(\text{CH}_2\text{Cl}_2)$  by TD-DFT method at the PBE1PBE level with the polarized continuum model (PCM).

| States          | $E$ , nm<br>(eV) | O.S.   | Component      | Contri. | Assignment                                            | Measured<br>Wavelength<br>(nm) |
|-----------------|------------------|--------|----------------|---------|-------------------------------------------------------|--------------------------------|
| T <sub>1</sub>  | 652<br>(1.90)    | 0.0000 | HOMO→LUMO      | 87%     | <sup>3</sup> LLCT/ <sup>3</sup> MLCT                  | 612                            |
| S <sub>8</sub>  | 520<br>(2.39)    | 0.0862 | HOMO-2→LUMO+1  | 78%     | <sup>1</sup> LLCT/ <sup>1</sup> MC/ <sup>1</sup> MLCT | 557                            |
|                 |                  |        | HOMO-3→LUMO    | 9%      | <sup>1</sup> LLCT/ <sup>1</sup> MLCT                  |                                |
| S <sub>9</sub>  | 486<br>(2.55)    | 0.0539 | HOMO-4→LUMO    | 85%     | <sup>1</sup> LLCT/ <sup>1</sup> MLCT                  | 446                            |
| S <sub>33</sub> | 348<br>(3.56)    | 0.2907 | HOMO→LUMO+5    | 19%     | <sup>1</sup> LLCT/ <sup>1</sup> MLCT                  | 368                            |
|                 |                  |        | HOMO-10→LUMO+1 | 19%     | <sup>1</sup> IL/ <sup>1</sup> MLCT/ <sup>1</sup> MC   |                                |
|                 |                  |        | HOMO-11→LUMO   | 18%     | <sup>1</sup> IL/ <sup>1</sup> LLCT                    |                                |
|                 |                  |        | HOMO-2→LUMO+4  | 11%     | <sup>1</sup> LLCT/ <sup>1</sup> MLCT                  |                                |
| S <sub>48</sub> | 323<br>(3.83)    | 0.8360 | HOMO-15→LUMO   | 26%     | <sup>1</sup> LLCT/ <sup>1</sup> IL                    | 320                            |
|                 |                  |        | HOMO-3→LUMO+5  | 22%     | <sup>1</sup> LLCT/ <sup>1</sup> MLCT                  |                                |
|                 |                  |        | HOMO-14→LUMO+1 | 9%      | <sup>1</sup> LLCT/ <sup>1</sup> IL/ <sup>1</sup> LMCT |                                |
|                 |                  |        | HOMO-11→LUMO   | 9%      | <sup>1</sup> IL/ <sup>1</sup> LLCT                    |                                |
|                 |                  |        | HOMO-2→LUMO+4  | 8%      | <sup>1</sup> LLCT/ <sup>1</sup> MLCT                  |                                |
| S <sub>93</sub> | 274<br>(4.52)    | 0.3503 | HOMO-8→LUMO+4  | 24%     | <sup>1</sup> LLCT                                     | 259                            |
|                 |                  |        | HOMO-10→LUMO+2 | 19%     | <sup>1</sup> IL/ <sup>1</sup> MLCT/ <sup>1</sup> MC   |                                |
|                 |                  |        | HOMO-26→LUMO   | 11%     | <sup>1</sup> IL                                       |                                |
|                 |                  |        | HOMO-25→LUMO+1 | 8%      | <sup>1</sup> IL/ <sup>1</sup> LMCT                    |                                |



**Table S9.** Partial molecular orbital compositions (%) in the ground state for solid-state **1**·CHCl<sub>3</sub> by TD-DFT method at the PBE1PBE level.

| Orbital | Energy (eV) | MO Contribution (%) |                                              |         |
|---------|-------------|---------------------|----------------------------------------------|---------|
|         |             | Pt (s/p/d)          | Me <sub>3</sub> SiC≡CbpyC≡CSiMe <sub>3</sub> | C≡CPhEt |
| LUMO+9  | 0.05        | 42.42 (76/19/4)     | 7.42                                         | 50.16   |
| LUMO+8  | 0           | 7.21 (1/71/27)      | 13.44                                        | 79.35   |
| LUMO+5  | -0.81       | 5.77 (13/39/48)     | 89.09                                        | 5.13    |
| LUMO+4  | -0.91       | 13.59 (44/49/7)     | 78.05                                        | 8.36    |
| LUMO+2  | -1.27       | 13.64 (46/42/12)    | 81.45                                        | 4.92    |
| LUMO+1  | -2.33       | 11.73 (37/37/26)    | 82.43                                        | 5.84    |
| LUMO    | -2.40       | 3.65 (2/38/61)      | 93.88                                        | 2.47    |
| HOMO    | -5.15       | 25.27 (1/1/99)      | 4.22                                         | 70.50   |
| HOMO-1  | -5.2        | 23.19 (1/1/98)      | 3.52                                         | 73.29   |
| HOMO-2  | -5.34       | 26.54 (1/5/94)      | 6.81                                         | 66.65   |
| HOMO-3  | -5.36       | 25.36 (1/6/93)      | 6.60                                         | 68.04   |
| HOMO-4  | -5.72       | 41.23 (2/2/96)      | 6.60                                         | 52.17   |
| HOMO-8  | -6.24       | 15.53 (10/3/86)     | 10.23                                        | 74.24   |
| HOMO-9  | -6.30       | 70.39 (25/0/75)     | 23.20                                        | 6.41    |
| HOMO-10 | -6.52       | 33.82 (24/0/76)     | 55.52                                        | 10.66   |
| HOMO-15 | -6.87       | 2.48 (18/6/76)      | 15.70                                        | 81.82   |

**Table S10.** Absorption and emission transition properties of  $1 \cdot \text{CHCl}_3$  by TD-DFT method at the PBE1PBE level with the polarized continuum model (PCM).

| States          | $E$ , nm (eV) | O.S.   | Component      | Contri. | Assignment                                            | Measured Wavelength (nm) |
|-----------------|---------------|--------|----------------|---------|-------------------------------------------------------|--------------------------|
| T <sub>1</sub>  | 636 (1.95)    | 0.0000 | HOMO→LUMO      | 82%     | <sup>3</sup> LLCT/ <sup>3</sup> MLCT                  | 612                      |
| S <sub>7</sub>  | 529 (2.34)    | 0.0694 | HOMO-2→LUMO+1  | 77%     | <sup>1</sup> LLCT/ <sup>1</sup> MLCT/ <sup>1</sup> MC | 561                      |
|                 |               |        | HOMO-3→LUMO    | 12%     | <sup>1</sup> LLCT/ <sup>1</sup> MLCT                  |                          |
| S <sub>9</sub>  | 482 (2.57)    | 0.0678 | HOMO-4→LUMO    | 87%     | <sup>1</sup> LLCT/ <sup>1</sup> MLCT                  | 445                      |
| S <sub>31</sub> | 348 (3.56)    | 0.4349 | HOMO-10→LUMO+1 | 65%     | <sup>1</sup> IL/ <sup>1</sup> MLCT/ <sup>1</sup> MC   | 364                      |
|                 |               |        | HOMO-2→LUMO+4  | 11%     | <sup>1</sup> LLCT/ <sup>1</sup> MC/ <sup>1</sup> MLCT |                          |
| S <sub>50</sub> | 321 (3.86)    | 0.4591 | HOMO-3→LUMO+5  | 56%     | <sup>1</sup> LLCT/ <sup>1</sup> MLCT                  | 322                      |
|                 |               |        | HOMO-15→LUMO   | 9%      | <sup>1</sup> LLCT/ <sup>1</sup> IL                    |                          |
| S <sub>91</sub> | 275 (4.51)    | 0.5383 | HOMO-10→LUMO+2 | 37%     | <sup>1</sup> IL/ <sup>1</sup> MLCT/ <sup>1</sup> MC   | 254                      |
|                 |               |        | HOMO→LUMO+8    | 14%     | <sup>1</sup> IL/ <sup>1</sup> MLCT                    |                          |

**Table S11.** Partial molecular orbital compositions (%) in the ground state for solid-state **1**·CH<sub>3</sub>CN by TD-DFT method at the PBE1PBE level.

| Orbital | Energy (eV) | MO Contribution (%) |                                              |         |
|---------|-------------|---------------------|----------------------------------------------|---------|
|         |             | Pt (s/p/d)          | Me <sub>3</sub> SiC≡CbpyC≡CSiMe <sub>3</sub> | C≡CPhEt |
| LUMO+6  | -0.55       | 2.22 (30/54/16)     | 96.37                                        | 1.41    |
| LUMO+5  | -0.88       | 6.18 (10/56/33)     | 90.06                                        | 3.75    |
| LUMO+4  | -0.98       | 5.69 (15/63/21)     | 89.89                                        | 4.42    |
| LUMO+3  | -1.3        | 11.89 (53/29/17)    | 85.06                                        | 3.05    |
| LUMO+1  | -2.39       | 12.37 (51/25/24)    | 83.77                                        | 3.86    |
| LUMO    | -2.53       | 5.00 (16/27/57)     | 91.58                                        | 3.43    |
| HOMO    | -4.86       | 19.96 (8/3/88)      | 4.65                                         | 75.38   |
| HOMO-1  | -5.01       | 18.31 (1/1/97)      | 3.93                                         | 77.76   |
| HOMO-4  | -5.28       | 42.42 (10/1/89)     | 3.91                                         | 53.67   |
| HOMO-5  | -5.59       | 40.97 (5/5/90)      | 7.96                                         | 51.07   |
| HOMO-6  | -5.67       | 64.23 (21/3/76)     | 5.94                                         | 29.83   |
| HOMO-11 | -6.62       | 5.54 (13/13/74)     | 92.09                                        | 2.38    |

**Table S12.** Absorption and emission transition properties of **1**·CH<sub>3</sub>CN by TD-DFT method at the PBE1PBE level with the polarized continuum model (PCM).

| States          | <i>E</i> , nm (eV) | O.S.   | Component      | Contri. | Assignment                                            | Measured Wavelength (nm) |
|-----------------|--------------------|--------|----------------|---------|-------------------------------------------------------|--------------------------|
| T <sub>1</sub>  | 751 (1.65)         | 0.0000 | HOMO→LUMO      | 87%     | <sup>3</sup> LLCT/ <sup>3</sup> MMLCT                 | 766                      |
| S <sub>12</sub> | 520 (2.38)         | 0.0511 | HOMO-6→LUMO    | 58%     | <sup>1</sup> MLCT/ <sup>1</sup> LLCT                  | 531                      |
|                 |                    |        | HOMO-5→LUMO    | 33%     | <sup>1</sup> LLCT/ <sup>1</sup> MLCT                  |                          |
| S <sub>13</sub> | 496 (2.50)         | 0.0391 | HOMO-5→LUMO+1  | 58%     | <sup>1</sup> LLCT/ <sup>1</sup> MLCT/ <sup>1</sup> MC | 498                      |
|                 |                    |        | HOMO-6→LUMO+1  | 32%     | <sup>1</sup> MLCT/ <sup>1</sup> LLCT/ <sup>1</sup> MC |                          |
| S <sub>53</sub> | 337 (3.68)         | 0.4652 | HOMO-11→LUMO+1 | 31%     | <sup>1</sup> IL                                       | 368                      |
|                 |                    |        | HOMO-6→LUMO+3  | 15%     | <sup>1</sup> MLCT/ <sup>1</sup> LLCT/ <sup>1</sup> MC |                          |
|                 |                    |        | HOMO-4→LUMO+5  | 11%     | <sup>1</sup> LLCT/ <sup>1</sup> MLCT                  |                          |
| S <sub>61</sub> | 321 (3.86)         | 0.2196 | HOMO-5→LUMO+4  | 70%     | <sup>1</sup> LLCT/ <sup>1</sup> MLCT                  | 332                      |
|                 |                    |        | HOMO-1→LUMO+6  | 10%     | <sup>1</sup> LLCT/ <sup>1</sup> MLCT                  |                          |
| S <sub>64</sub> | 318 (3.90)         | 0.2800 | HOMO-6→LUMO+4  | 53%     | <sup>1</sup> MLCT/ <sup>1</sup> LLCT                  | 256                      |

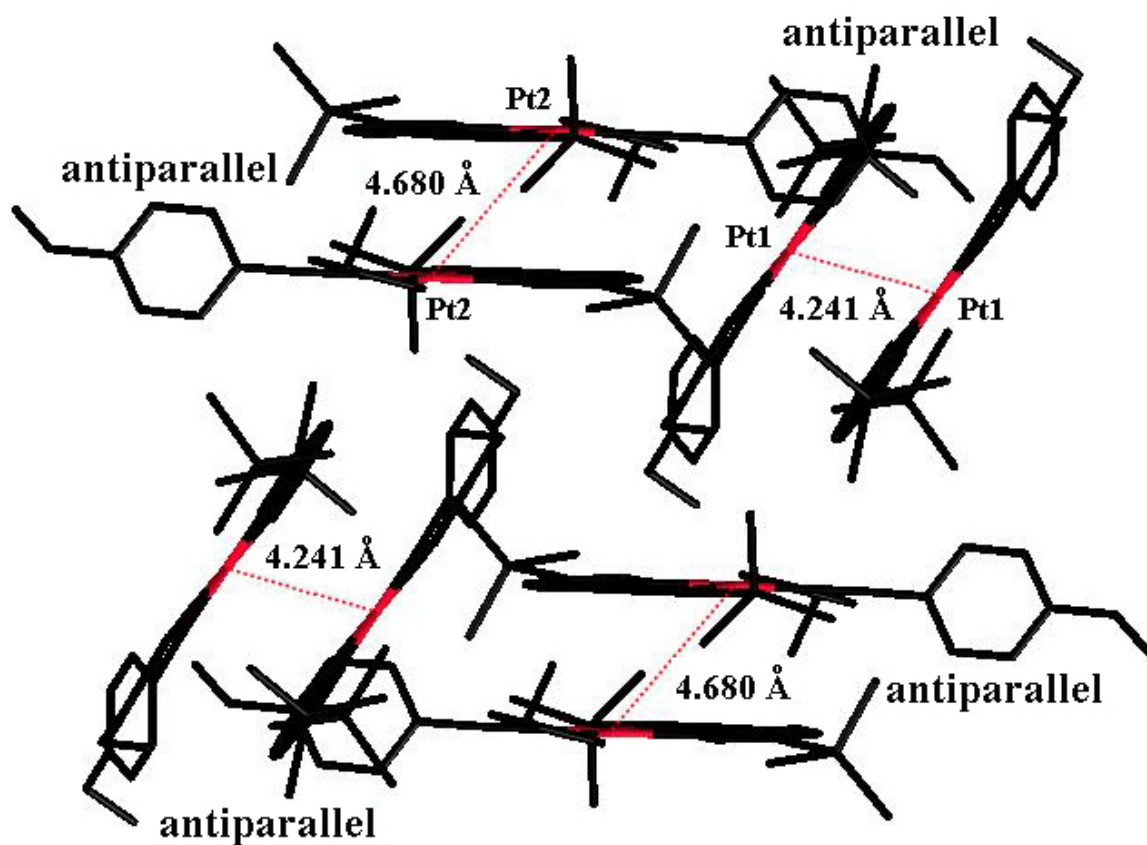

**Figure S1.** Crystal packing diagram of adjacent planar platinum moieties in  $1 \cdot \text{CHCl}_3$ , showing an antiparallel pattern in the case of  $\text{Pt} \cdots \text{Pt} > 3.5 \text{ \AA}$ .

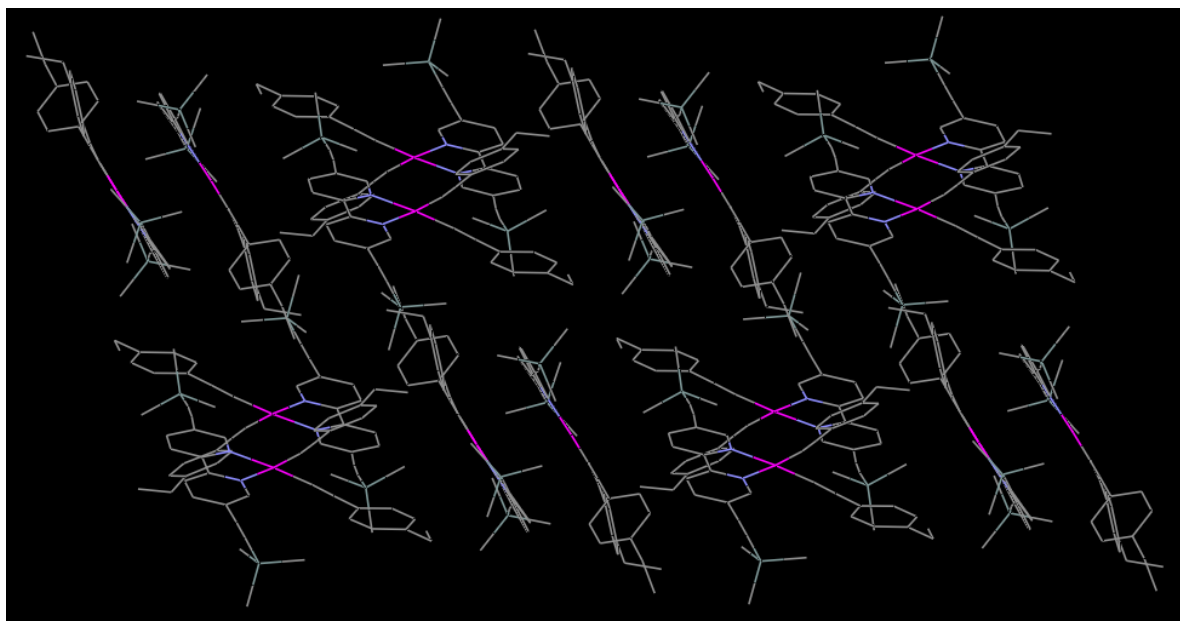

**Figure S2.** One Pt moiety plane in  $1 \cdot 1\frac{1}{2}\text{CH}_2\text{Cl}_2$ , observed from  $c$  axis direction. H atoms are omitted for clarity.

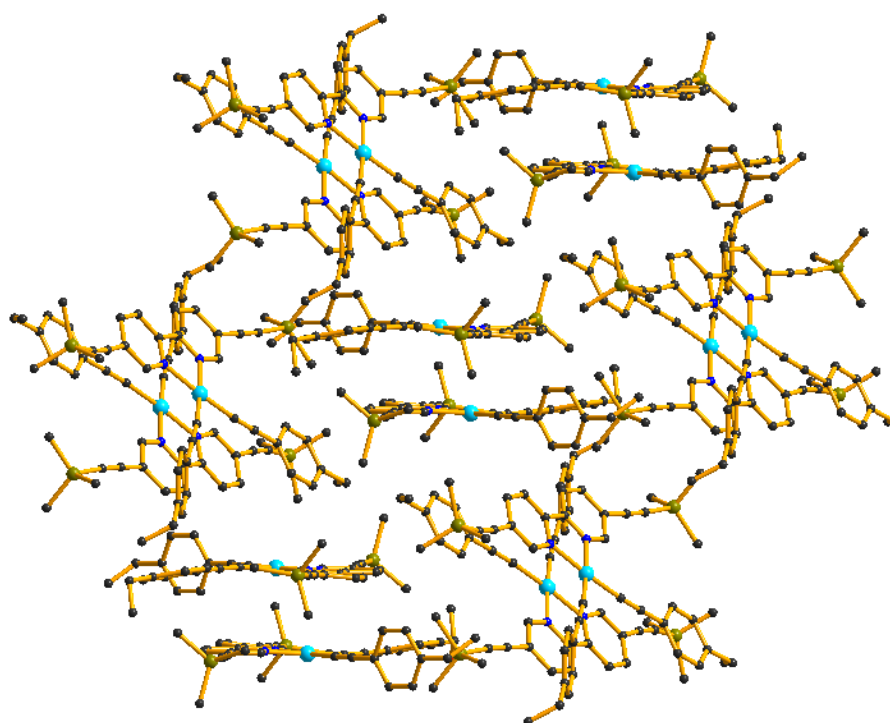

**Figure S3.** One Pt moiety plane in  $1 \cdot \text{CHCl}_3$ , observed from  $c$  axis direction. H atoms are omitted for clarity.

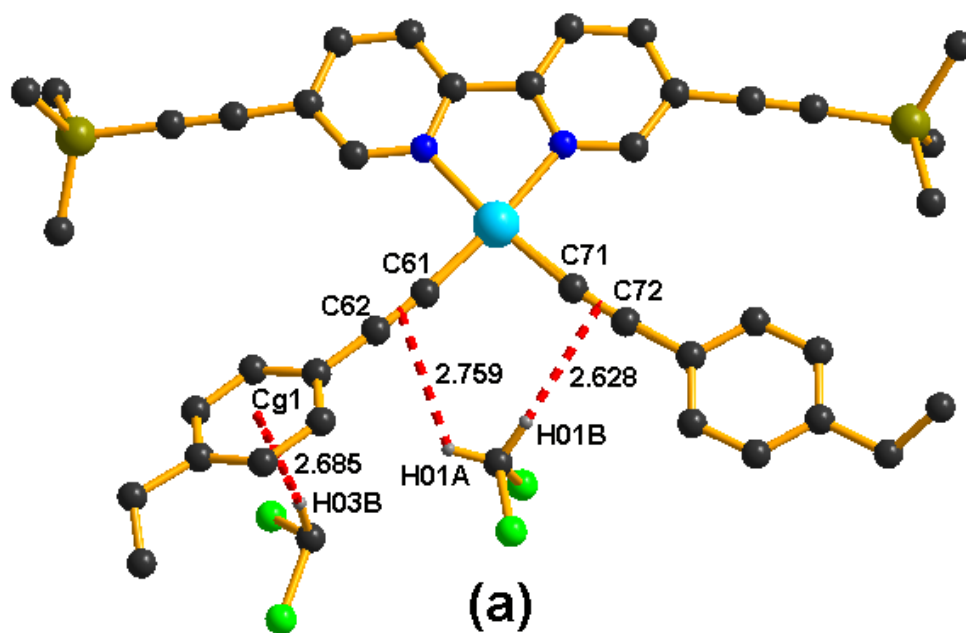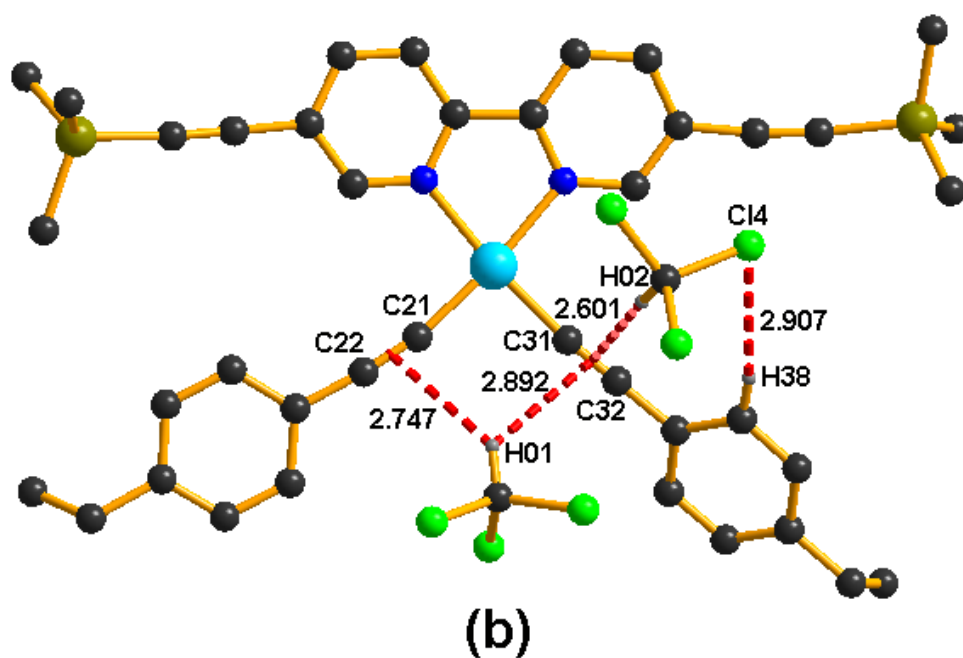

**Figure S4.** The hydrogen bonds between solvate molecules and platinum moieties in  $1 \cdot 1\frac{1}{2}\text{CH}_2\text{Cl}_2$  (a) and  $1 \cdot \text{CHCl}_3$  (b). H atoms not participating in the hydrogen bonds have been omitted for clarity.

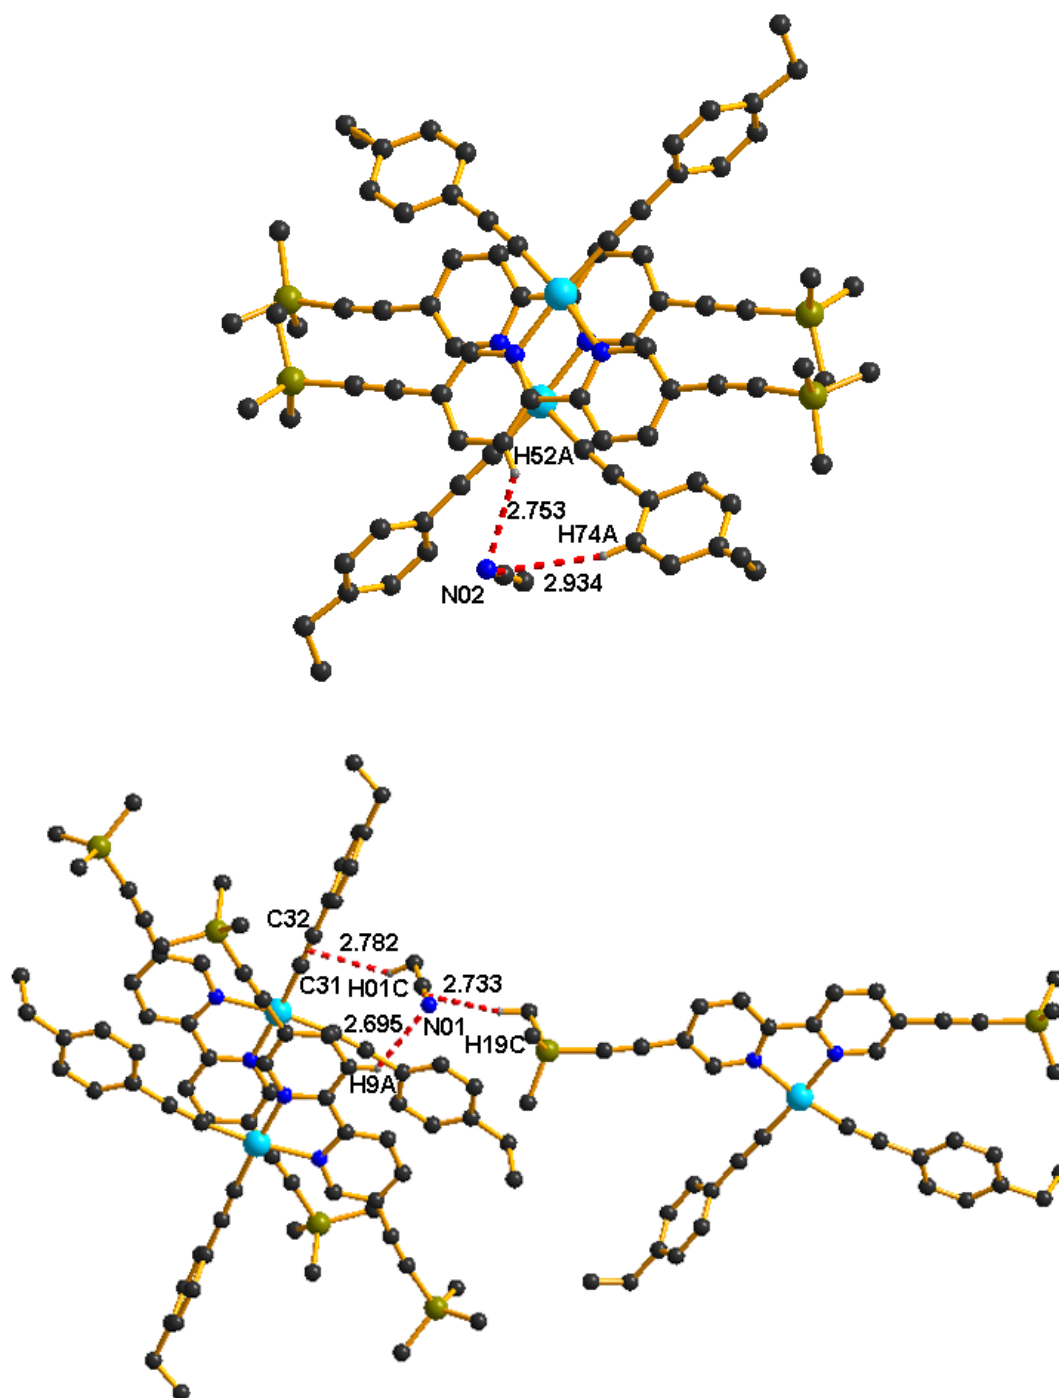

**Figure S5.** The hydrogen bonds between solvate molecules and platinum moieties in **1**·CH<sub>3</sub>CN. H atoms not participating in the hydrogen bonds have been omitted for clarity.



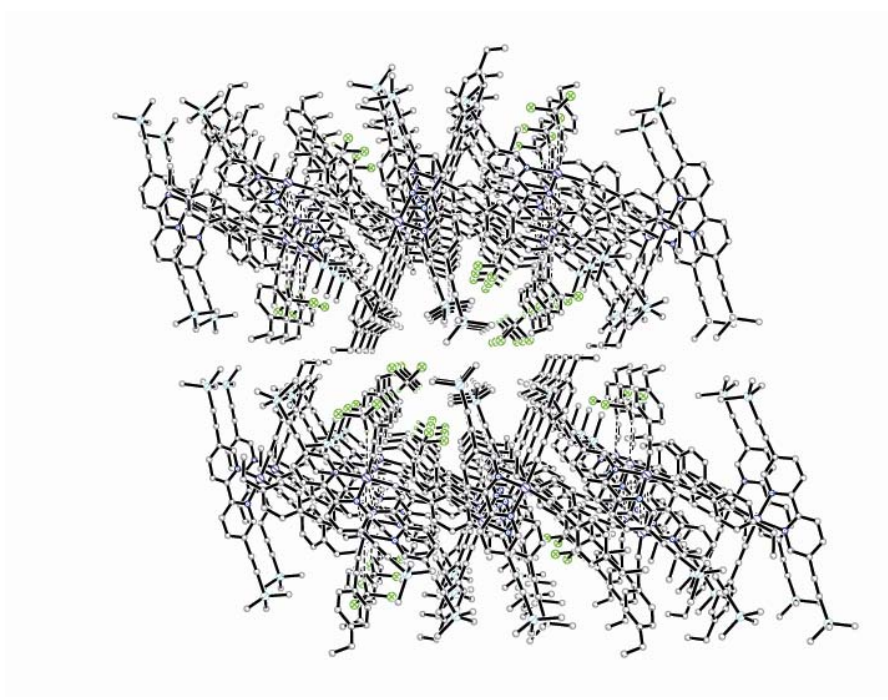

**Figure S6.** The layer stacking structure of  $1 \cdot 1\frac{1}{2}\text{CH}_2\text{Cl}_2$ . H atoms in Pt moieties are omitted for clarity.

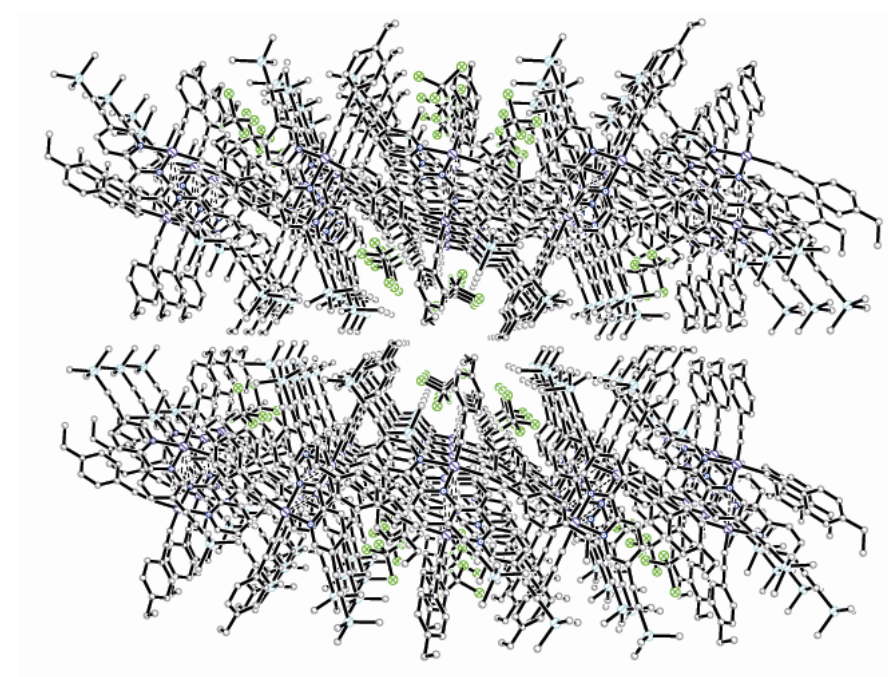

**Figure S7.** The layer stacking structure of  $1 \cdot \text{CHCl}_3$ . H atoms in Pt moieties are omitted for clarity.

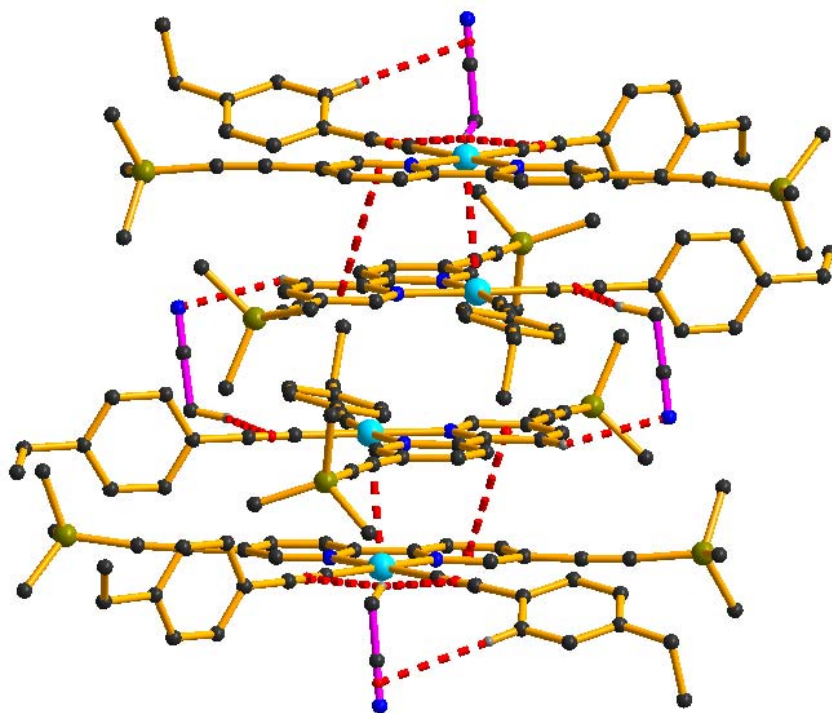

**Figure S8.** 1-D column structure in **1**·CH<sub>3</sub>CN. Acetonitrile solvate molecules are marked in pink color. H atoms not participating in the hydrogen bonds have been omitted for clarity.

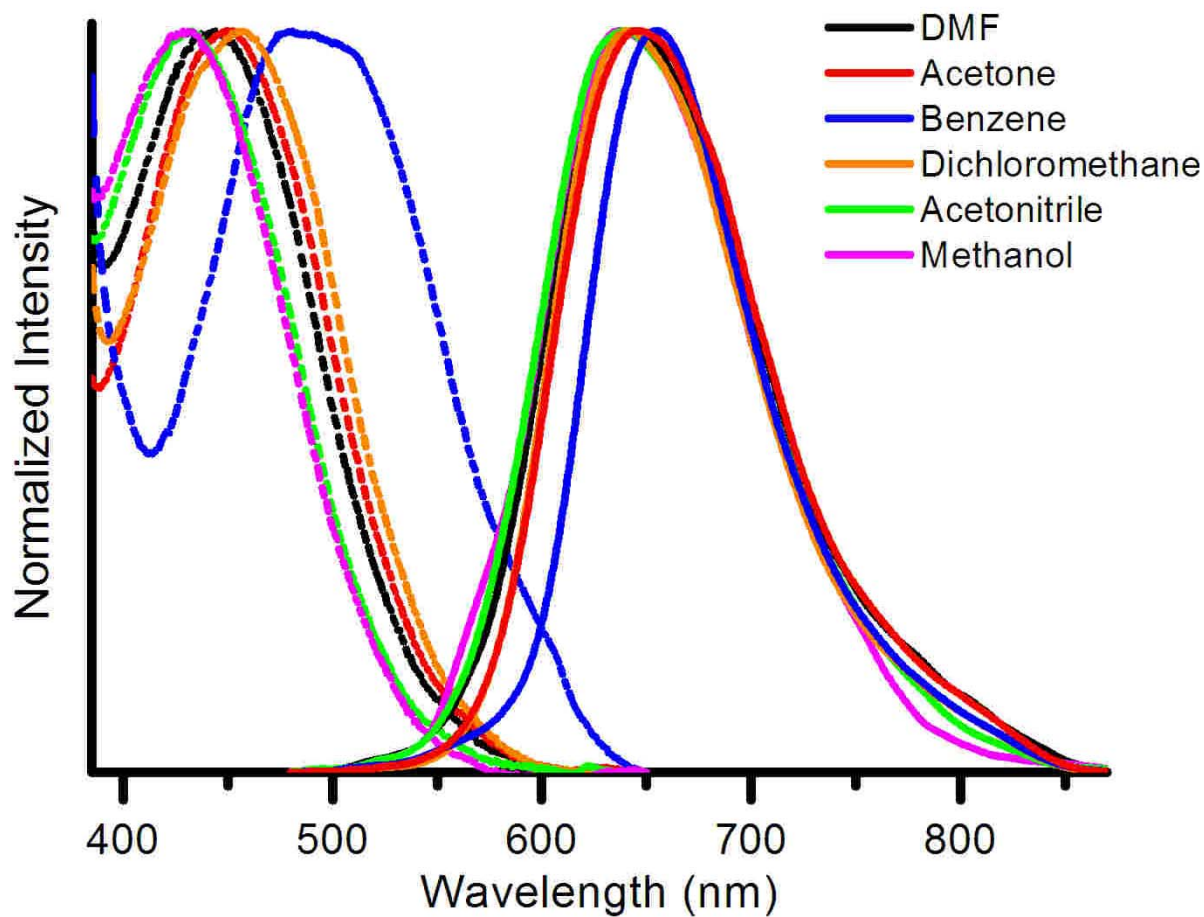

**Figure S9.** Low-energy absorption (dash lines) and emission spectra (solid lines) of **1** in various solvents at ambient temperature.

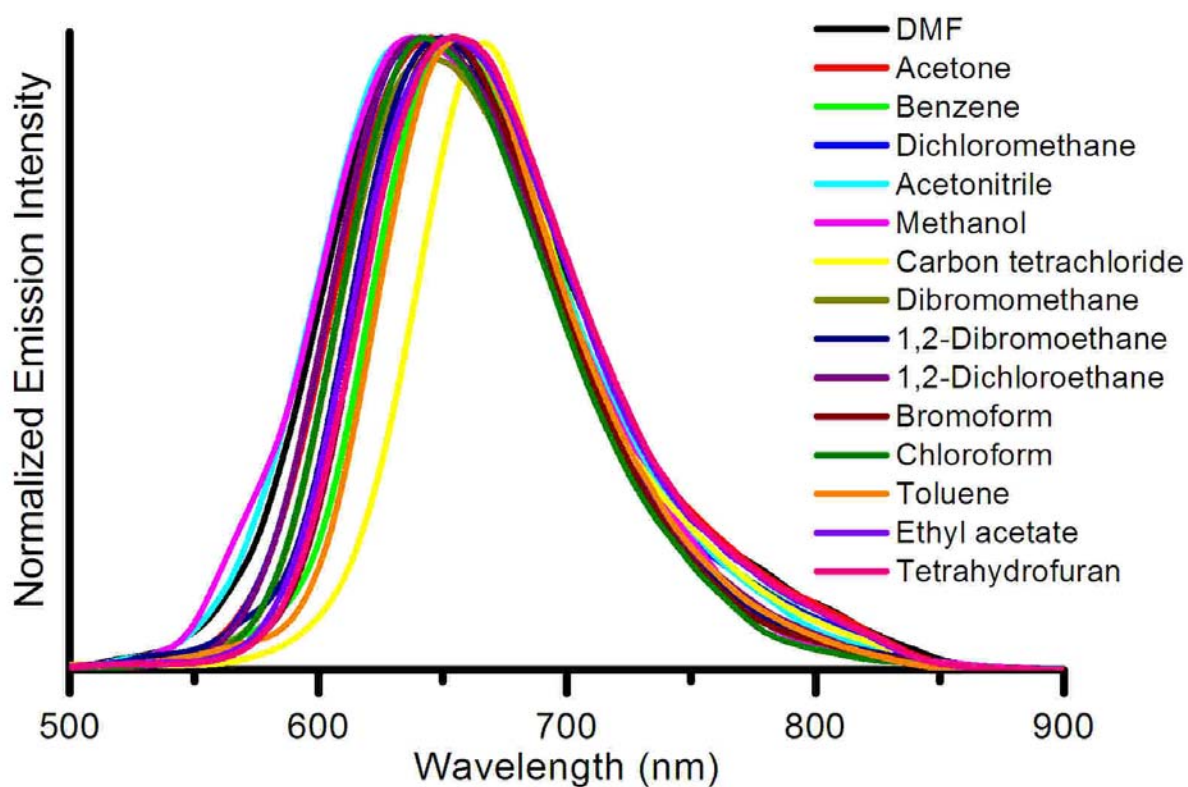

**Figure S10.** Liquid state emission spectra of **1** in various solvents at ambient temperature.

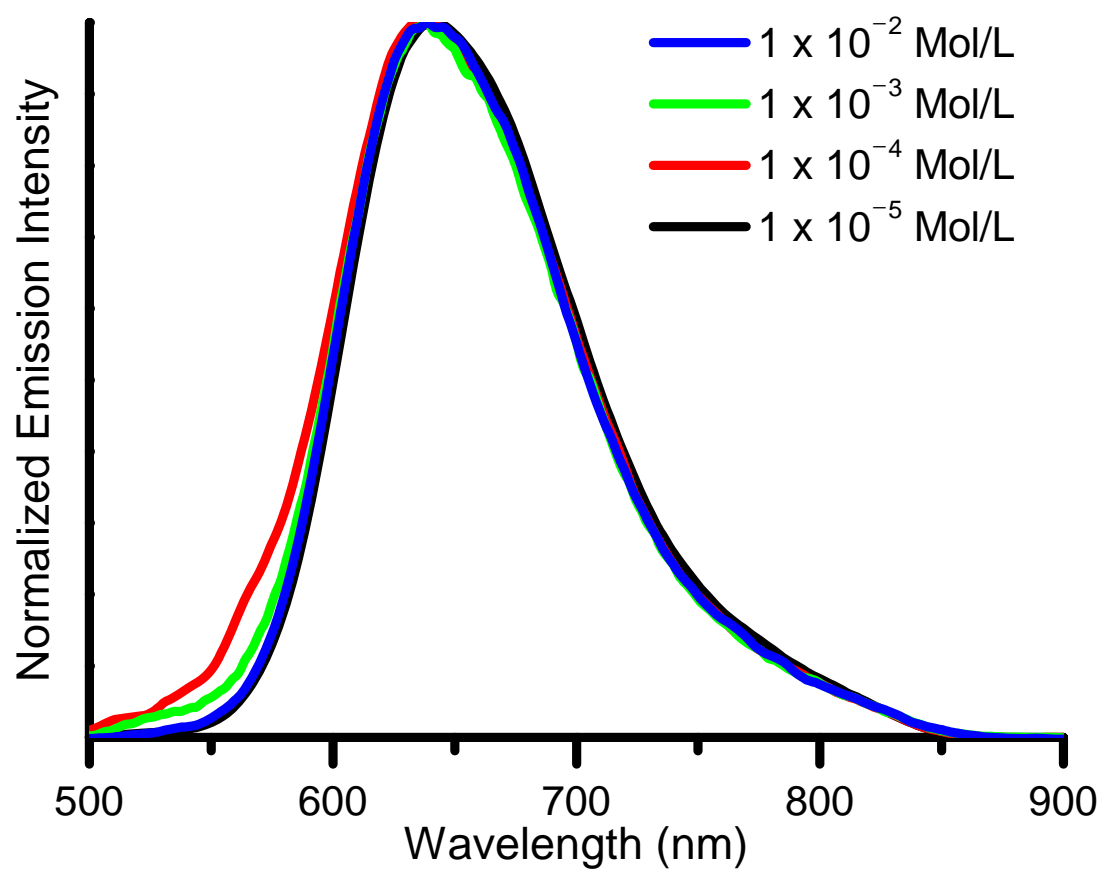

**Figure S11.** Liquid state emission spectra of **1** in CH<sub>2</sub>Cl<sub>2</sub> solution with different concentration at ambient temperature.

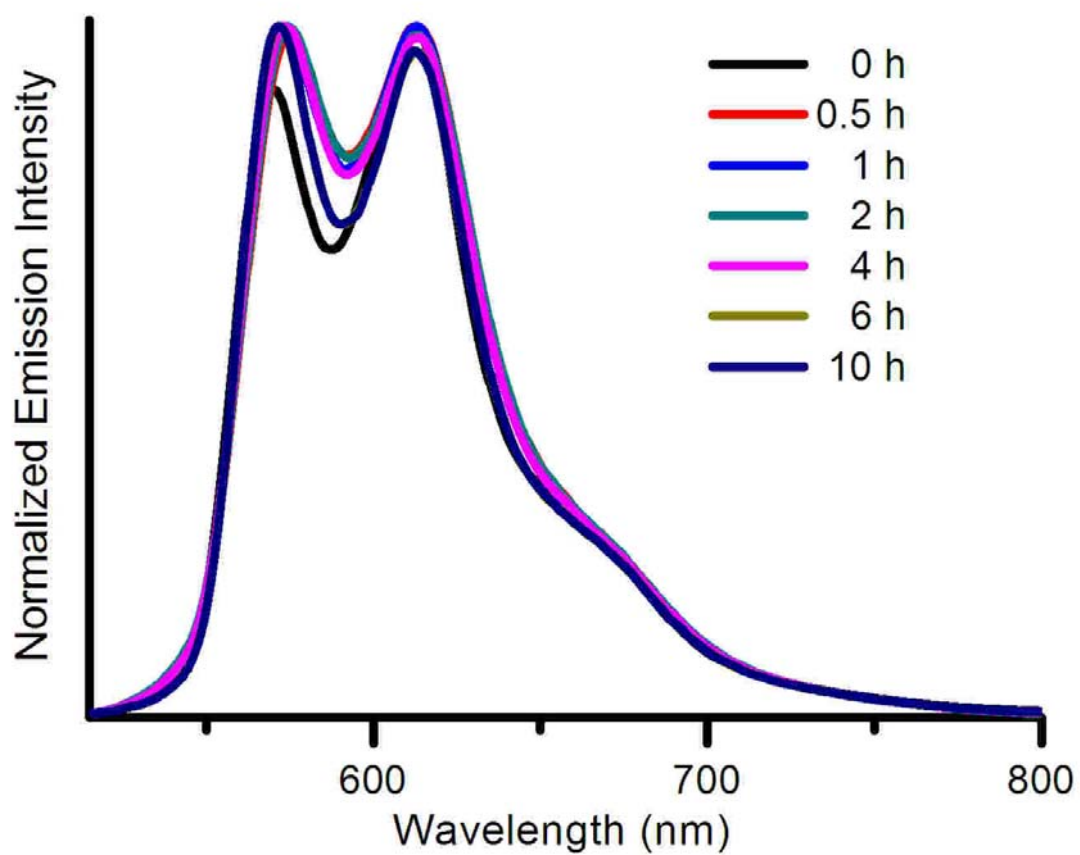

**Figure S12.** Solid state emission spectra of  $1 \cdot 1\frac{1}{2}\text{CH}_2\text{Cl}_2$  during desorption process by heating at  $120^\circ\text{C}$  under  $\text{N}_2$  atmosphere.

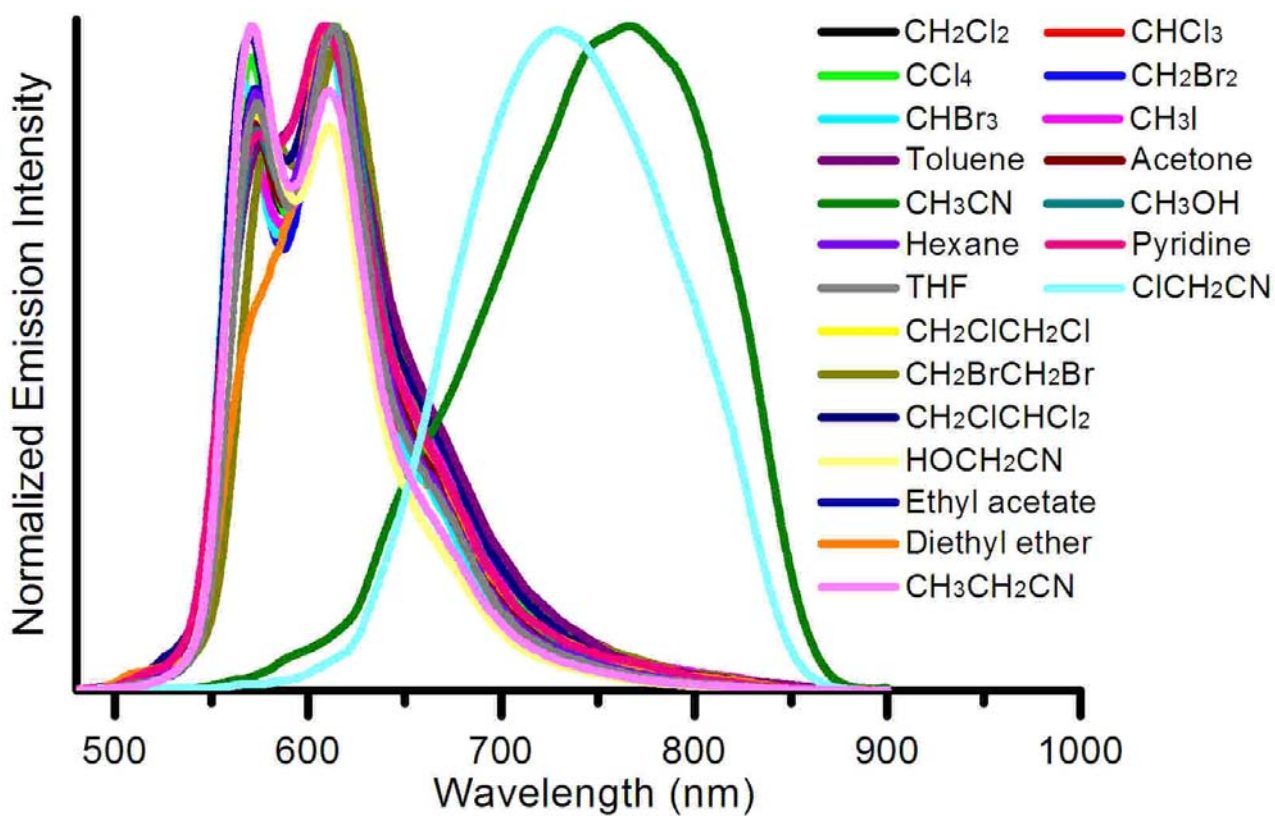

**Figure S13.** Emission spectra of solid sample **1** upon exposure to various VOC vapors at ambient temperature.

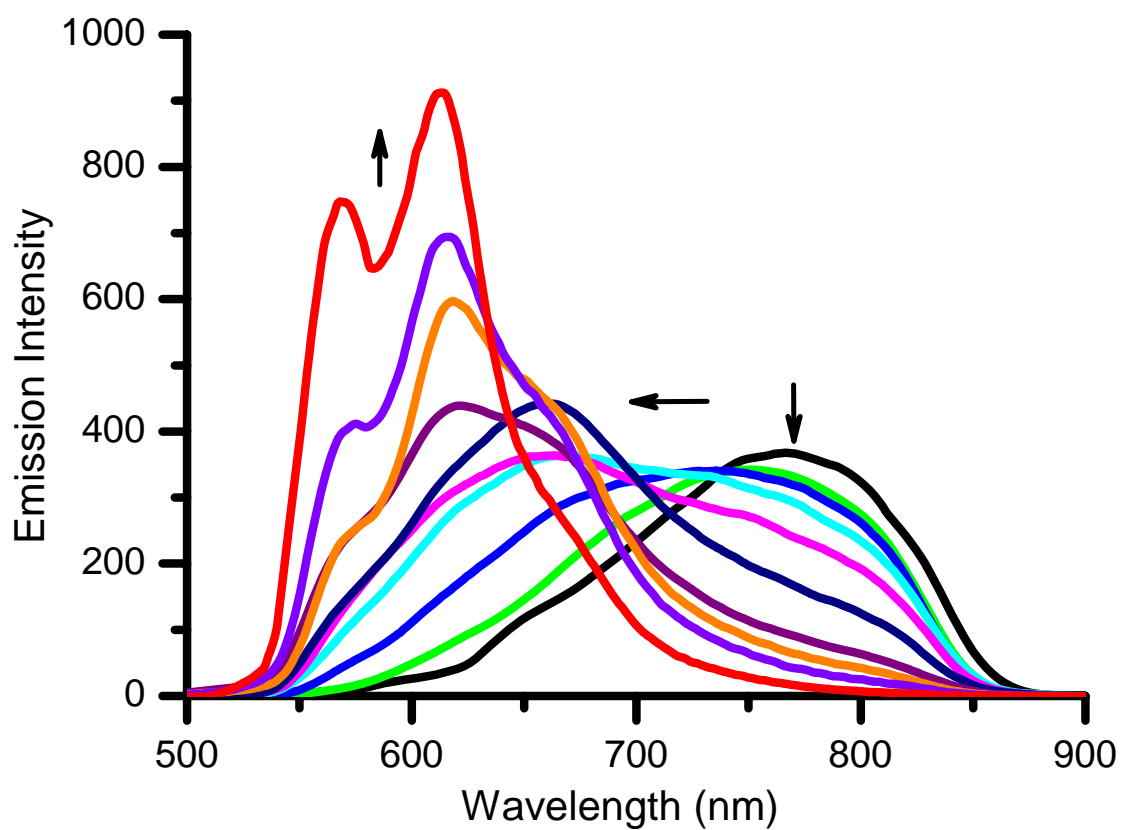

**Figure S14.** Dynamic emission spectral changes of 1·CH<sub>3</sub>CN by heating at 120°C for 10 hours under N<sub>2</sub> atmosphere.



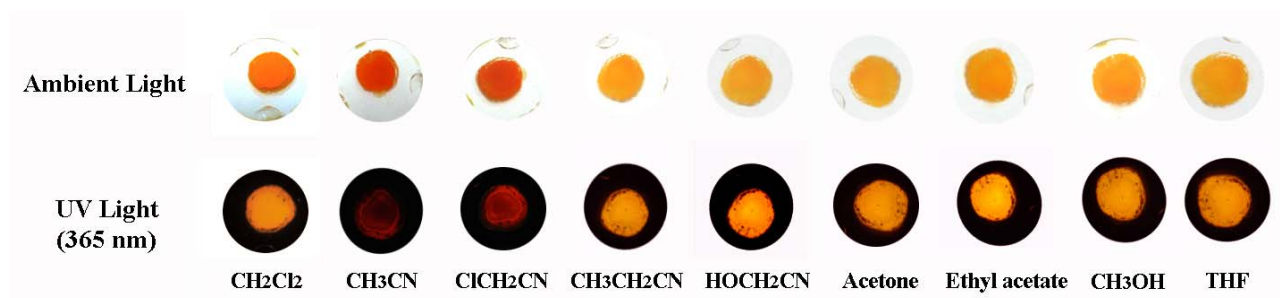

**Figure S15.** Photographic images of **1** deposited on quartz slices and exposed to selected organic vapors under ambient light and UV light irradiation (365 nm).

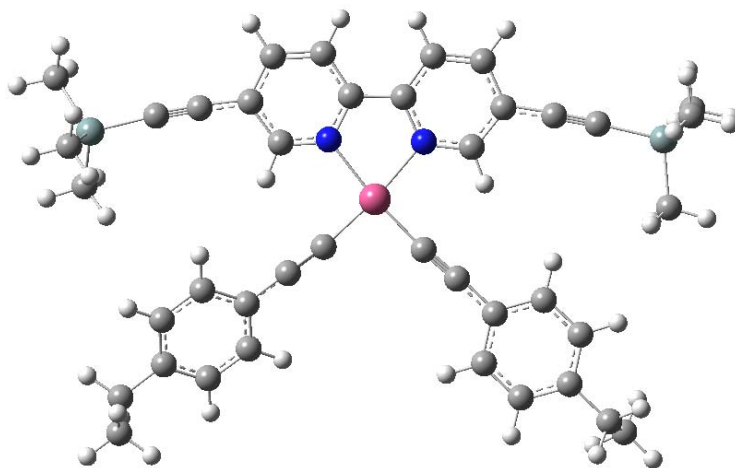

**Figure S16.** Optimized structure of **1** in the ground state by DFT method at the PBE1PBE level.

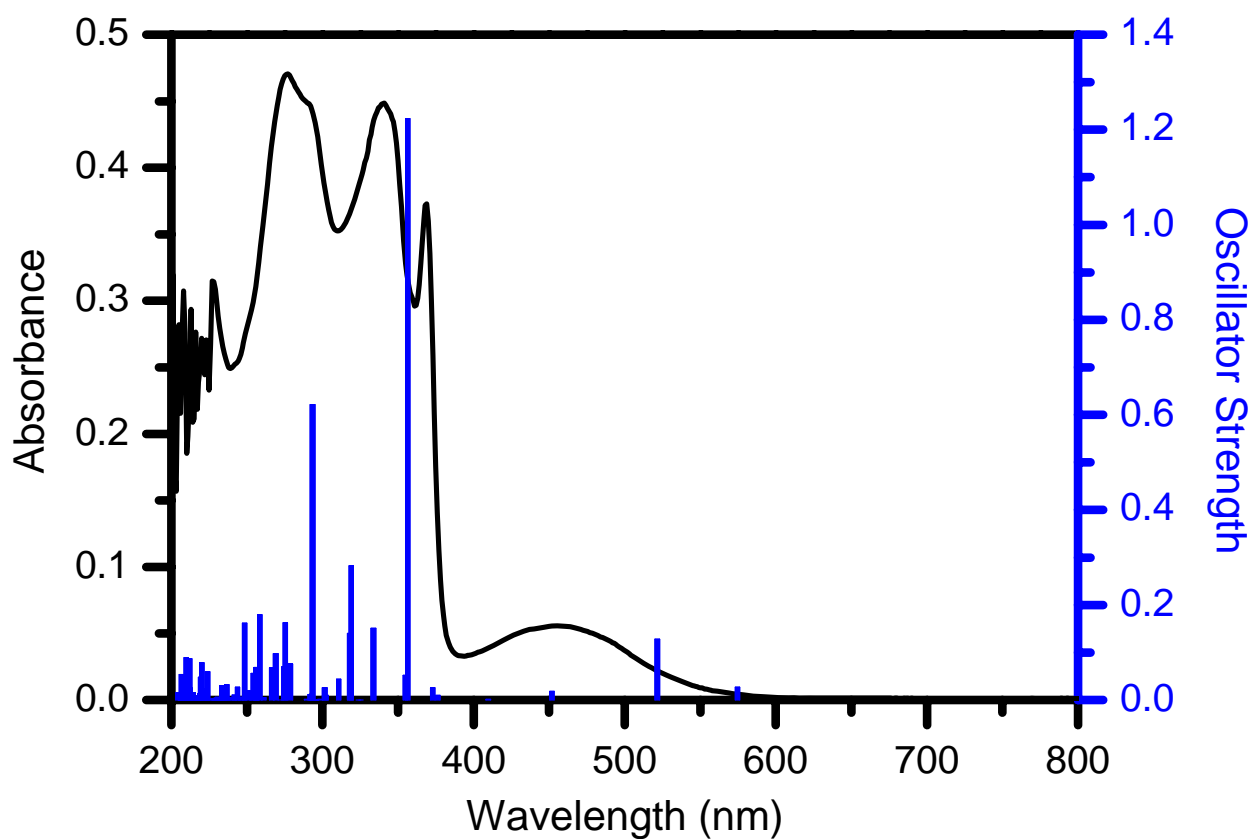

**Figure S17.** Calculated (blue vertical bars) and measured (black line) UV-vis absorption spectra of **1** in dichloromethane solution at ambient temperature.

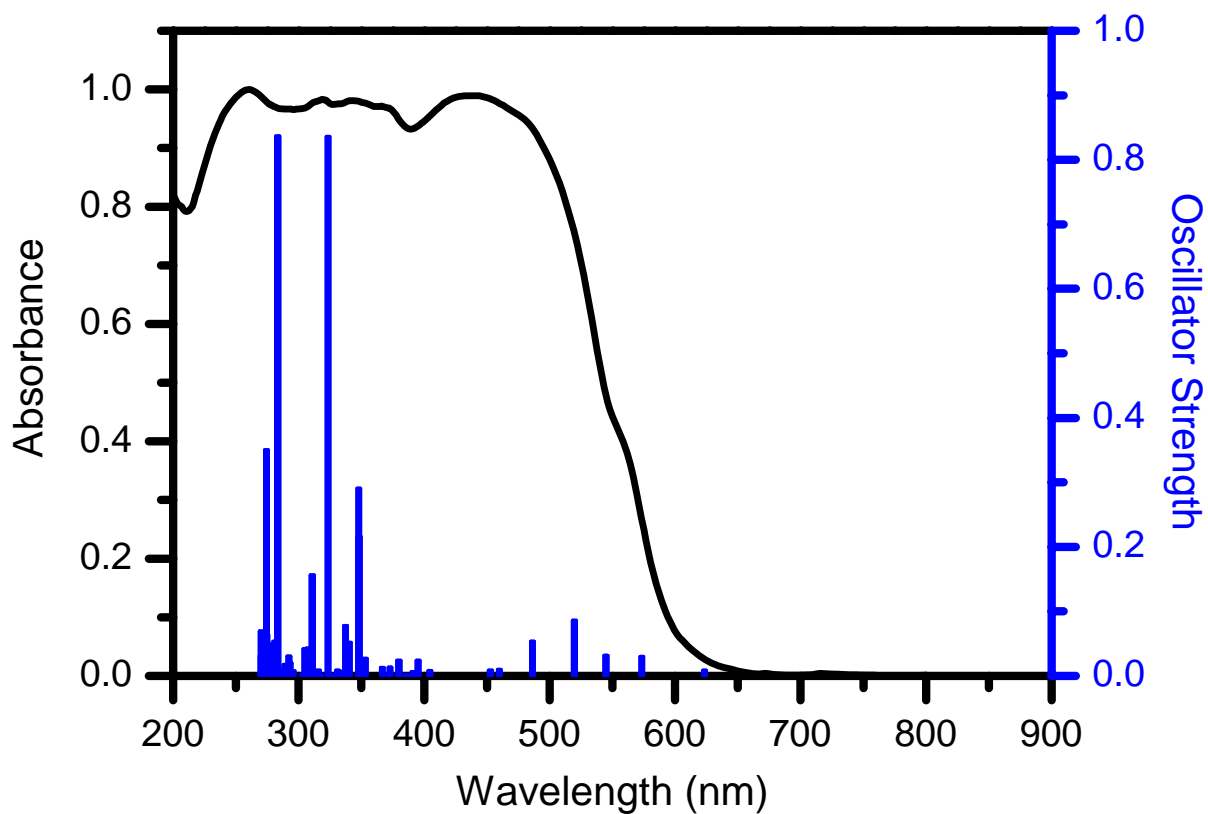

**Figure S18.** Calculated (blue vertical bars) and measured (black line) UV-vis absorption spectra of solid-state  $1 \cdot 1\frac{1}{2}\text{CH}_2\text{Cl}_2$  at ambient temperature.

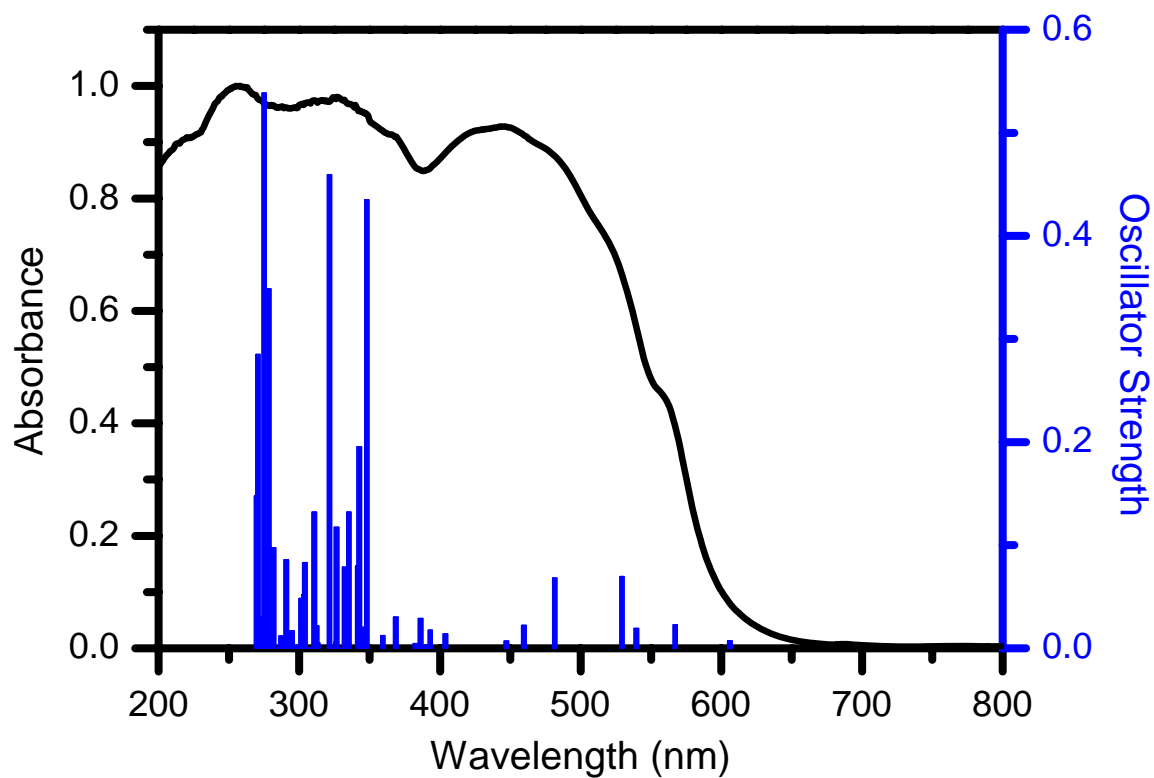

**Figure S19.** Calculated (blue vertical bars) and measured (black line) UV-vis absorption spectra of solid-state  $1 \cdot \text{CHCl}_3$  at ambient temperature.

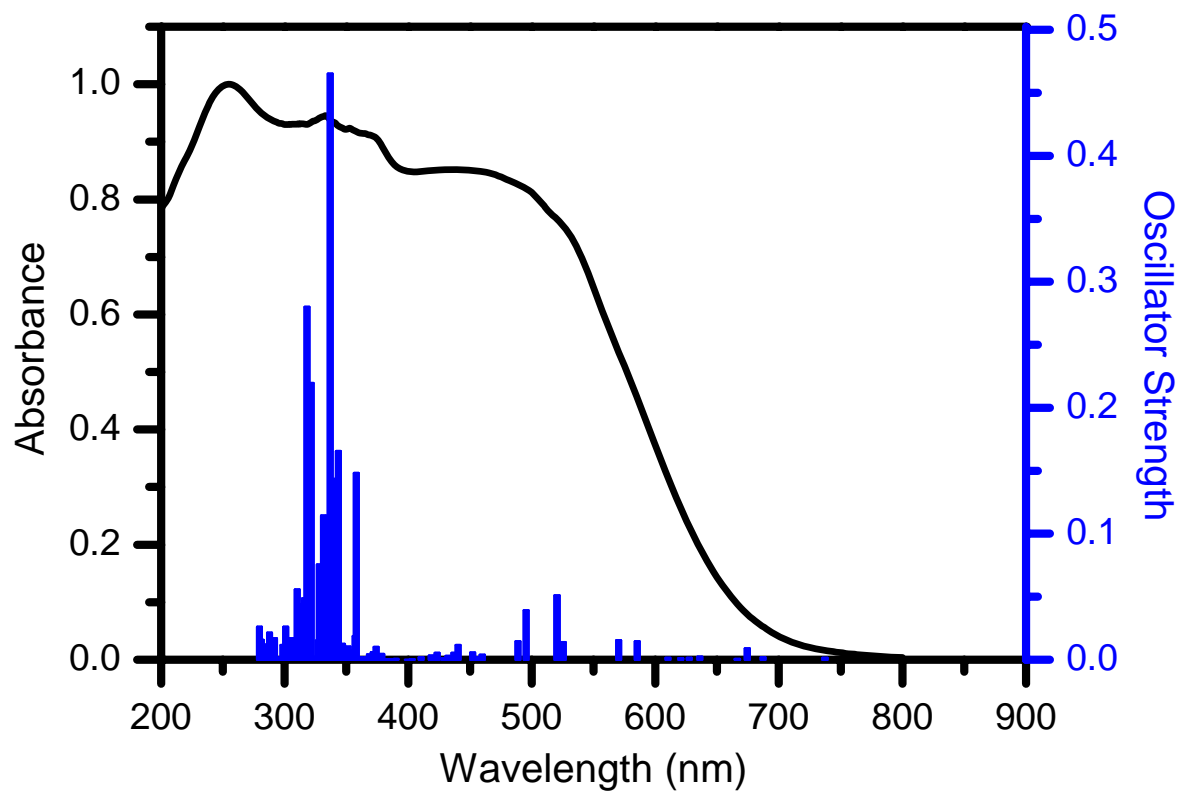

**Figure S20.** Calculated (blue vertical bars) and measured (black line) UV-vis absorption spectra of solid-state **1**·CH<sub>3</sub>CN at ambient temperature.

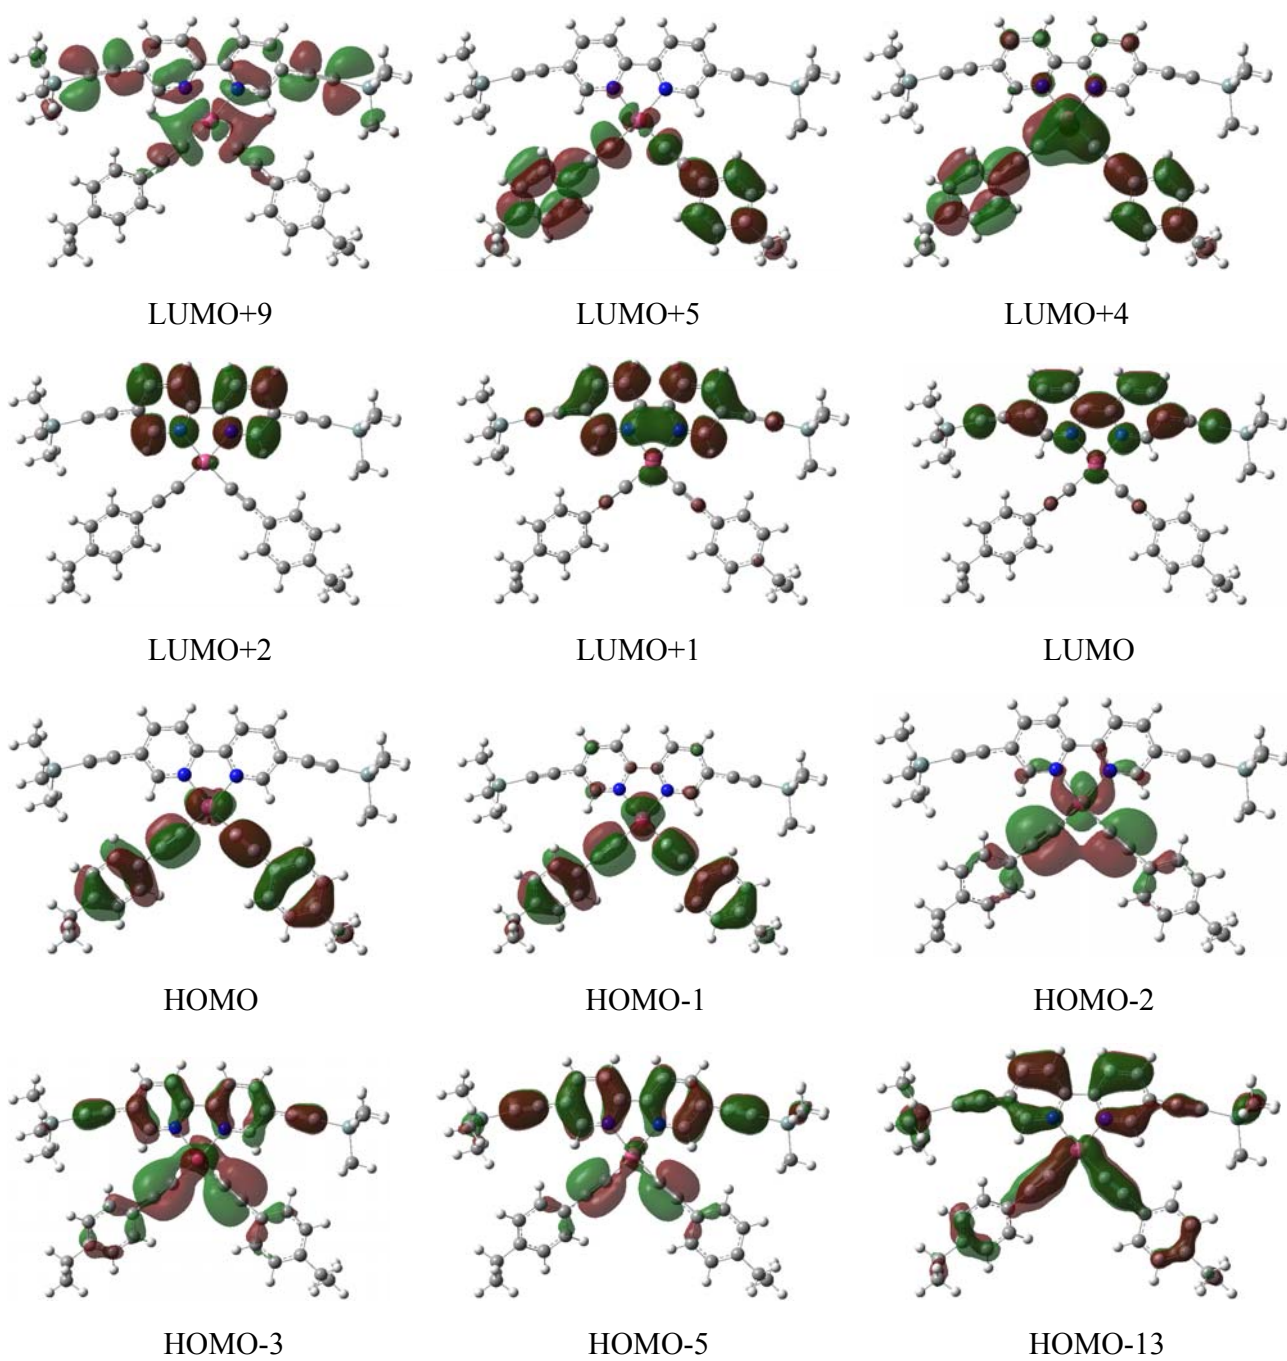

**Figure S21.** Plots of the frontier molecular orbitals involved in the absorption of **1** in dichloromethane solution (isovalue = 0.02).

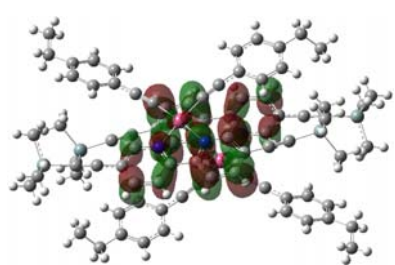

LUMO+5

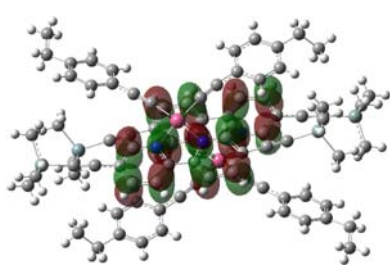

LUMO+4

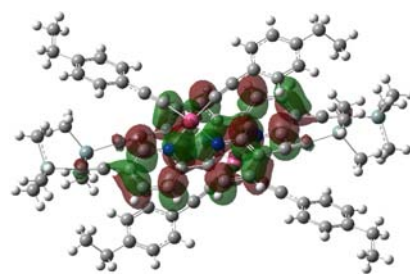

LUMO+2

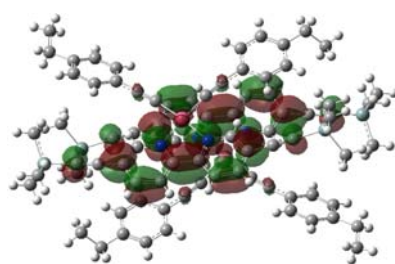

LUMO+1

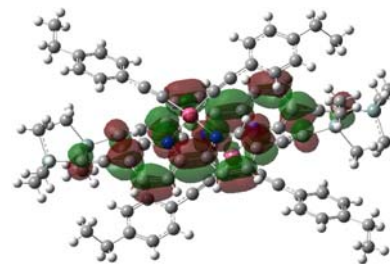

LUMO

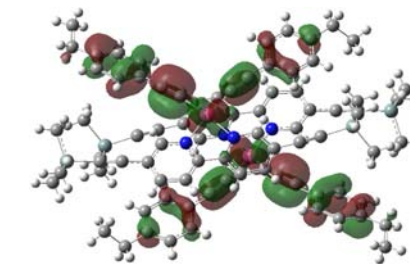

HOMO

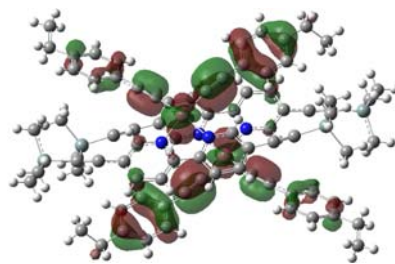

HOMO-2

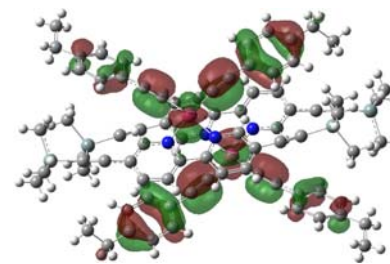

HOMO-3

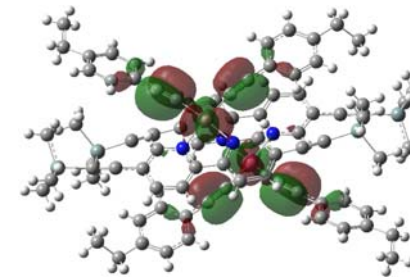

HOMO-4

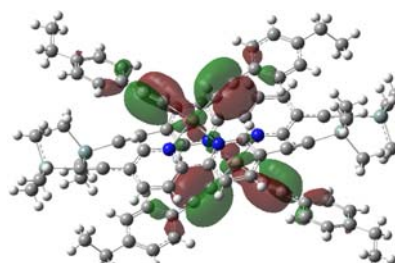

HOMO-8

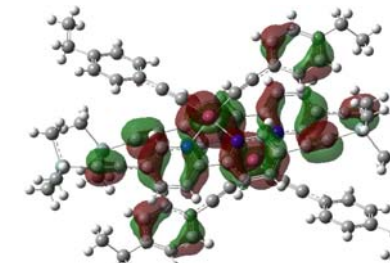

HOMO-10

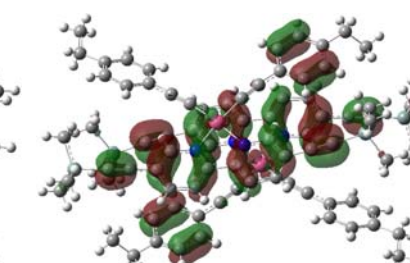

HOMO-11

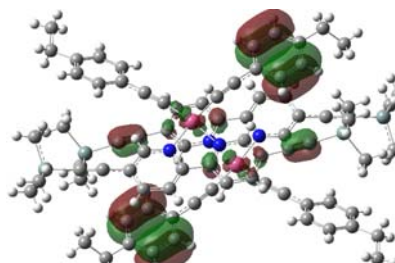

HOMO-14

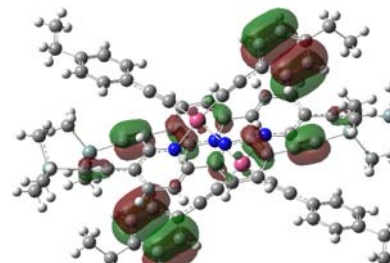

HOMO-15

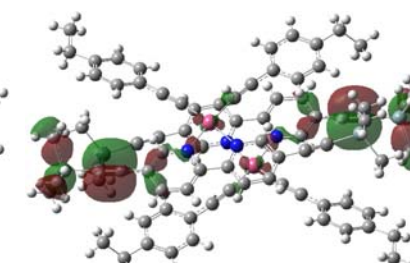

HOMO-25

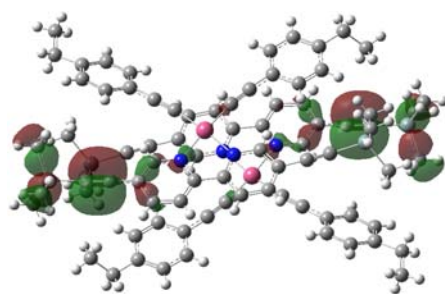

HOMO-26

**Figure S22.** Plots of the frontier molecular orbitals involved in the absorption of  $1 \cdot 1\frac{1}{2}(\text{CH}_2\text{Cl}_2)$  in solid state (isovalue = 0.02).



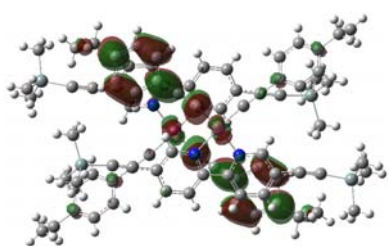

LUMO+9

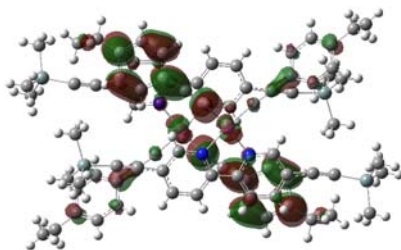

LUMO+8

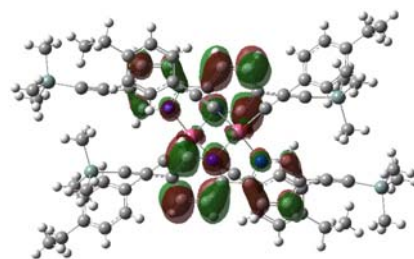

LUMO+5

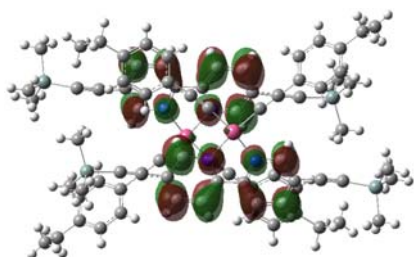

LUMO+4

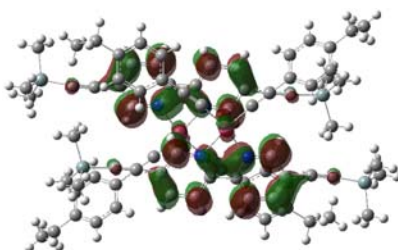

LUMO+2

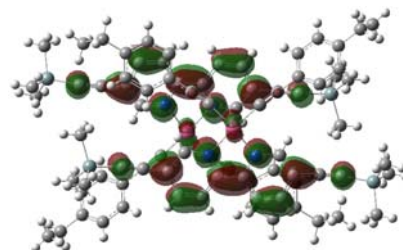

LUMO+1

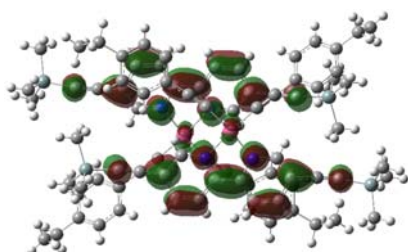

LUMO

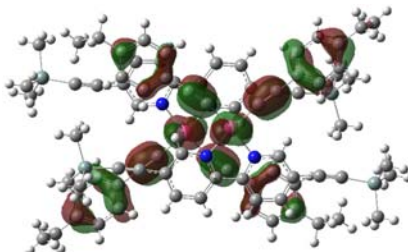

HOMO

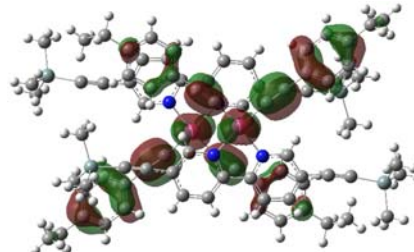

HOMO-1

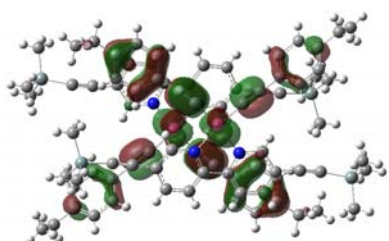

HOMO-2

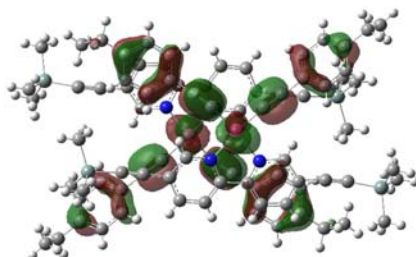

HOMO-3

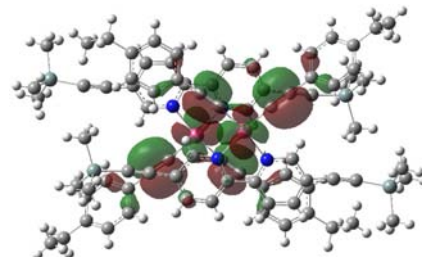

HOMO-4

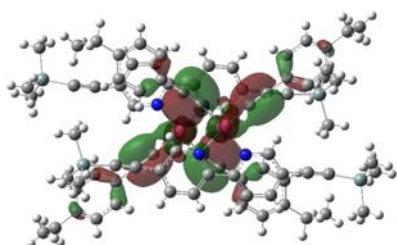

HOMO-8

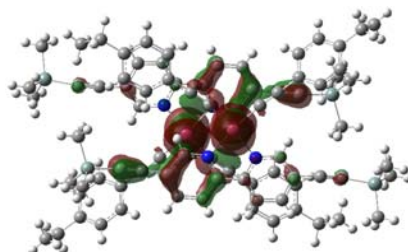

HOMO-9

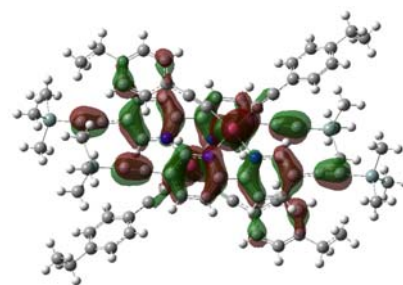

HOMO-10

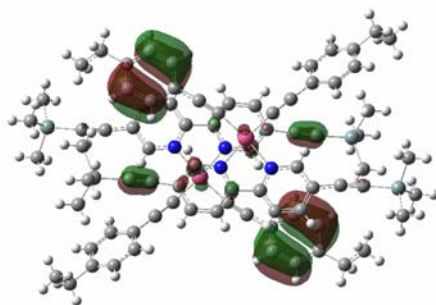

HOMO-15

**Figure S23.** Plots of the frontier molecular orbitals involved in the absorption of **1**·CHCl<sub>3</sub> in solid state (isovalue = 0.02).

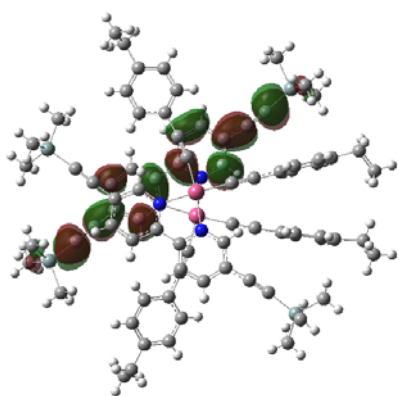

LUMO+6

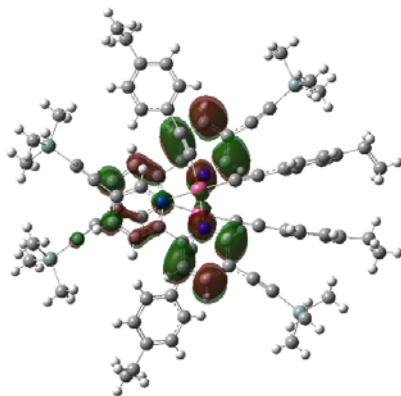

LUMO+5

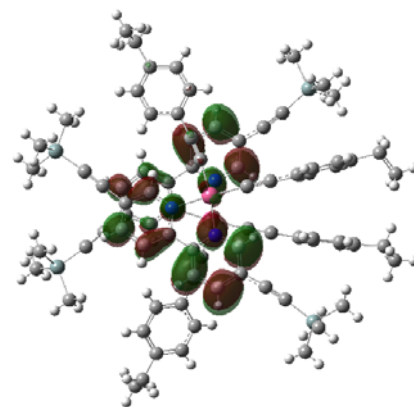

LUMO+4

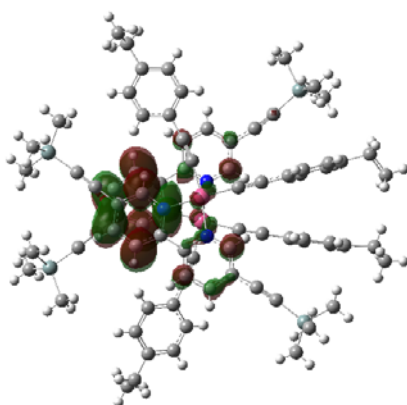

LUMO+3

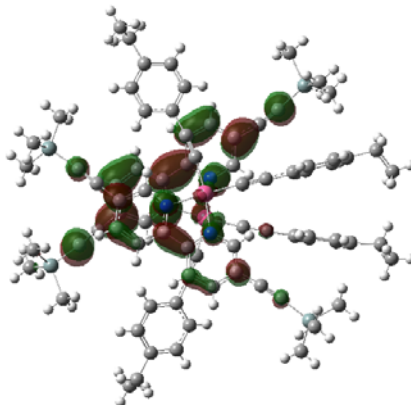

LUMO+1

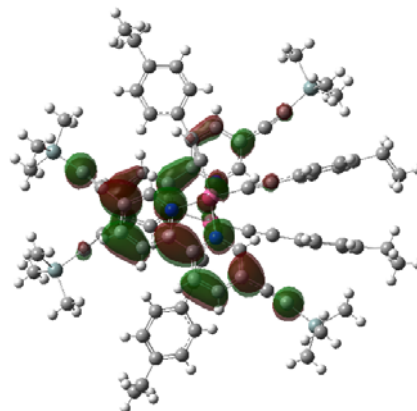

LUMO

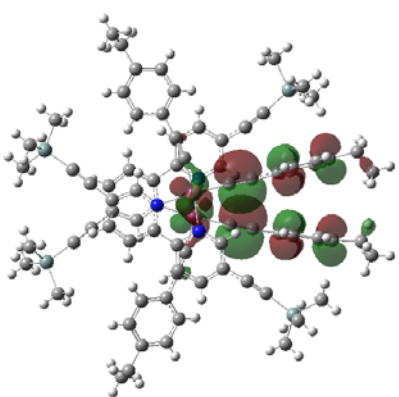

HOMO

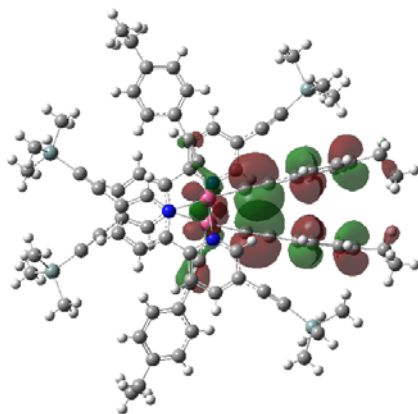

HOMO-1

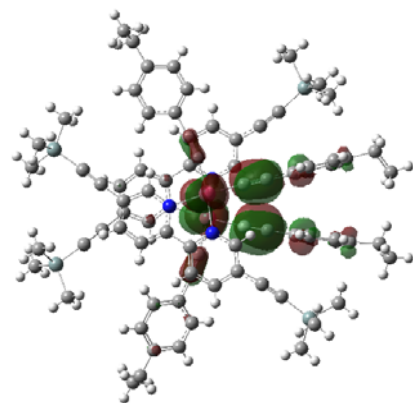

HOMO-4

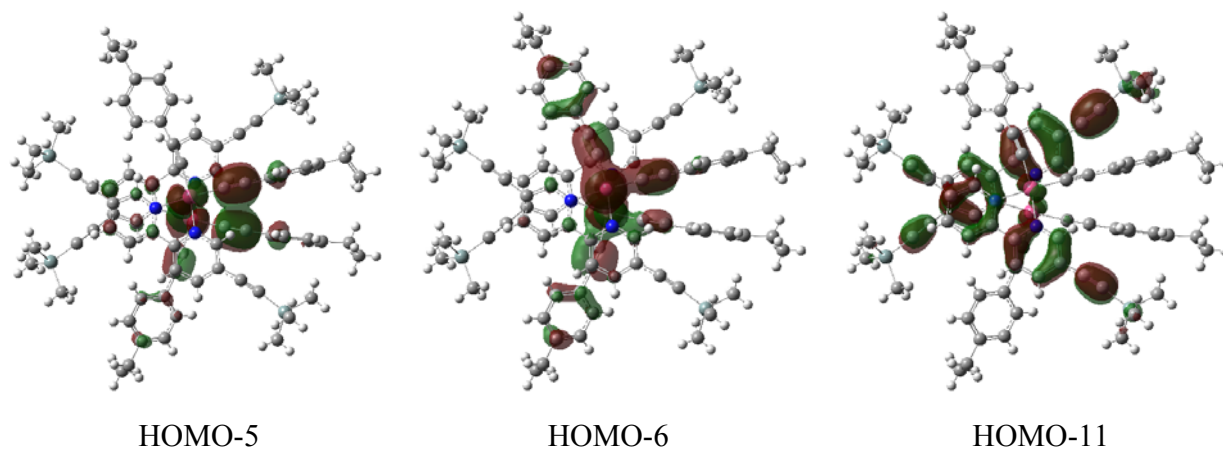

**Figure S24.** Plots of the frontier molecular orbitals involved in the absorption of  $1 \cdot \text{CH}_3\text{CN}$  in solid state (isovalue = 0.02).
